## Integrin expression and localization in normal MDCK cells and transformed MDCK cells lacking apical polarity

Cora-Ann Schoenenberger<sup>1</sup>, Anna Zuk<sup>2</sup>, Gregory M. Zinkl<sup>2</sup>, Donna Kendall<sup>3</sup> and Karl S. Matlin<sup>2,\*</sup>

<sup>1</sup>Maurice E. Müller Institute, Biocenter, University of Basel, Switzerland

<sup>2</sup>Renal Unit, Massachusetts General Hospital, 149 13th Street, Boston, Massachusetts, and Department of Anatomy and Cellular Biology, Harvard Medical School, Boston, Massachusetts, USA

<sup>3</sup>GI Cell Biology Research Laboratory, Children's Hospital, Boston, Massachusetts, USA

\*Author for correspondence

### SUMMARY

Epithelial cells polarize in response to contacts with the extracellular matrix and with neighboring cells. Interactions of cells with the extracellular matrix are mediated mainly by the integrin family of receptors. To begin to understand the role of integrins in polarization, we have investigated the expression and localization of three integrin families in the polarized Madin-Darby canine kidney (MDCK) epithelial cell line and in transformed MDCK cells lacking apical polarity. We find that MDCK cells express several  $\beta_1$  integrins, including  $\alpha_2\beta_1$ ,  $\alpha_3\beta_1$ , and an unidentified integrin designated  $\alpha_x\beta_1$ . The  $\beta_1$  integrins are the major receptors for collagens I and IV and laminin in MDCK cells, since a blocking anti- $\beta_1$  antibody almost totally abolishes adhesion to these proteins. They also express a vitronectin receptor tentatively identified as  $\alpha_v\beta_3$ , and the epithelial-specific integrin  $\alpha_6\beta_4$ . The latter is not a laminin receptor in MDCK cells because a function blocking anti- $\alpha_6$  antibody has no effect on cell adhesion to

laminin. All three integrin families are expressed exclusively on both the basal and lateral surfaces, as determined by immunofluorescence microscopy and surface biotinylation. Transformed MDCK cells express  $\beta_1$  integrins as well as  $\alpha_v\beta_3$  and  $\alpha_6\beta_4$ , but show alterations in the  $\beta_1$  family. Expression of  $\alpha_x$  is lacking, and the relative amount of the  $\beta_1$  subunit is diminished, resulting in the accumulation of Endo-H-sensitive  $\alpha_3$ . In addition, surface biotinylation and immunofluorescence indicate that significant amounts of both  $\alpha_2\beta_1$  and  $\alpha_3\beta_1$  appear on not only the basolateral but also the apical plasma membrane. These results indicate that integrins are the major receptors for the extracellular matrix in MDCK cells, and that they may affect epithelial cell polarization by mediating not only cell-substratum but also cell-cell contacts.

Key words: epithelial polarity, integrin, MDCK

### INTRODUCTION

Epithelial cells form the interface between compartments in complex organisms and, by their secretory and absorptive functions, alter the compartments they separate (Matlin and Caplan, 1992). In kidney tubules, for example, the epithelium divides the urinary space from the interstitium while selective transporters act to concentrate the urine and recover essential minerals and metabolites. To play these roles, epithelial cells must be polarized (Matlin and Caplan, 1992; Rodriguez-Boulan and Nelson, 1989; Rodriguez-Boulan and Powell, 1992). Their plasma membranes are divided into three domains with distinct protein and lipid compositions. The apical or free surface faces what is topographically the outside world and is often characterized by specialized structures such as microvilli and cilia involved in the absorption or movement of luminal fluid. The lateral surface interacts with neighboring cells and is distinguished by the presence of a variety of complex intercellular junctions, such as the tight junction, and other proteins involved in cell-cell adhesion. The basal surface abutting the

substratum participates in specific interactions with proteins of the basal lamina such as laminin, collagen IV and heparan sulfate proteoglycans (Boll et al., 1991; Matlin and Caplan, 1992; Rodriguez-Boulan and Nelson, 1989; Rodriguez-Boulan and Powell, 1992).

Studies of the biogenesis of polarity suggest that polarization requires both cell-cell and cell-substratum adhesion (Matlin and Caplan, 1992; Parry et al., 1990; Rodriguez-Boulan and Nelson, 1989; Rodriguez-Boulan and Powell, 1992). During early development of the kidney, for example, differentiation of the tubular epithelium occurs in two stages (Eklblom, 1989, 1992). In the first, induced cells of the metanephric mesenchyme become tightly adherent, forming cell aggregates called condensates. Next, a basal lamina is deposited along the periphery of the condensates causing its conversion from a solid mass of cells to a hollow ball composed of an inwardly facing, polarized epithelium (Eklblom, 1989, 1992). Experiments mainly utilizing the polarized cell line MDCK (Madin-Darby canine kidney) have permitted the dissection of the contributions of cell-cell

contacts and cell-substratum contacts to the polarization process. When cultured on artificial substrata under conditions in which cell-cell contacts do not form, MDCK cells are still able to polarize both endogenous and exogenous membrane proteins to the apical surface, suggesting that interaction with the substratum is adequate for the establishment of at least a rudimentary apical domain (Ojakian et al., 1990; Rodriguez-Boulan et al., 1983; Vega-Salas et al., 1987). Polarization of proteins to the basolateral pole, on the other hand, is largely dependent on the formation of cell-cell contacts (McNeil et al., 1990; Nelson and Hammerton, 1989; Nelson and Veshnock, 1986, 1987a,b; Rodriguez-Boulan and Nelson, 1989).

Although the functions of cell-cell adhesion molecules such as E-cadherin in the polarization process are under intense investigation, the roles of equivalent cell-substratum adhesion proteins in polarization have not been explored in detail (Boll et al., 1991; Parry et al., 1990). In particular, it is not known how the integrins, a large family of receptors for the extracellular matrix, influence the morphogenesis of the polarized phenotype. Integrins are heterodimeric transmembrane glycoproteins found in every eucaryotic cell type except erythrocytes (Hemler, 1991; Hynes, 1992; Ruoslahti, 1991). Most epithelial integrins are composed of complexes between the  $\beta_1$ ,  $\beta_3$  or  $\beta_4$  subunits and a variety of different  $\alpha$  subunits, yielding receptors for collagens, laminins, vitronectin and fibronectin (Hemler, 1991; Hynes, 1992; Ruoslahti, 1991). While most  $\alpha$  subunits associate exclusively with a single  $\beta$  subunit, there are notable exceptions. The  $\alpha_6$  subunit, for example, interacts not only with  $\beta_1$ , where it forms a receptor for laminin, but also with  $\beta_4$ , creating a distinct receptor for laminin or components of the anchoring filaments of hemidesmosomes (Hemler, 1991; Hynes, 1992; Lee et al., 1992; Quaranta and Jones, 1991; Sonnenberg et al., 1991, 1990a; Stepp et al., 1990). Individual heterodimers may also display multiple ligand specificities. For example,  $\alpha_2\beta_1$  can act as a receptor for either collagen or laminin, and  $\alpha_3\beta_1$  can act as a receptor for either laminin, collagen or fibronectin (Hemler, 1991; Hynes, 1992; Ruoslahti, 1991).

Integrins are thought to play important roles in a number of pathological processes, which may involve the breakdown of epithelial polarity. During carcinogenesis, changes in integrin expression may lead to altered differentiation or induction of invasive behaviour (Giancotti and Ruoslahti, 1990; Pignatelli and Bodmer, 1990; Plantefaber and Hynes, 1989; Ruoslahti, 1991). Loss of integrin function following ischemic damage in kidney tubular cells might contribute to the sloughing off of cells into the lumen, thus obstructing urine production (Gailit et al., 1993; Goligorsky et al., 1993; Racusen, 1992). Following injury, expression of new integrins may lead to infiltration of inflammatory cells (Arnout, 1990; Springer, 1990), or facilitate cell migration to close wounds (Clark, 1988; Humphries et al., 1991).

As part of the long-term interests of our laboratory in understanding the biogenesis of epithelial polarity, we have begun to examine the functions of integrins in the polarized epithelial cell line MDCK. Here, we report an analysis of the integrins expressed not only by normal MDCK cells but also by oncogenically transformed MDCK cells that lack apical polarity and grow in multilayers. What we find is that MDCK cells utilize a complex set of integrins to interact with not only the substratum but possibly also with neighboring cells, and

that the expression and localization of these integrins is perturbed by transformation. Our results lay the groundwork for future studies of the role of integrins in epithelial polarization.

## MATERIALS AND METHODS

### Cell culture

For the present study, MDCK II cells and MDCK cells transformed with the viral Kirsten-*ras* oncogene were used (Matlin and Simons, 1984; Schoenenberger et al., 1991). As a control, some experiments also utilize the MDCK cell line C6, which was derived from normal MDCK II cells by transfection with the same pMV7 vector used to introduce *K-ras* (Schoenenberger et al., 1991). C6 cells are identical to the parental cell line with regard to ultrastructure, distribution of plasma membrane proteins, and transepithelial resistance. The transformed MDCK cell lines designated R2, R3 and R5, express increasing levels of *ras* p21. In particular, the R5 line, which expresses the highest level, forms multilayers and exhibits basolateral but not apical polarity (Schoenenberger et al., 1991).

For routine culture, MDCK II (passages 7-33) and transformed (R2, R3, R5; passages 7-15) and non-transformed (C6; passages 7-15) cell lines were grown in MEM (GIBCO Laboratories, Grand Island, NY) supplemented with Earle's salts, 5% fetal bovine serum (FBS, Sigma Chemical Co., St Louis MO), 2 mM L-glutamine (Sigma) and 10 mM HEPES (Sigma), pH 7.4, at 37°C/5% CO<sub>2</sub>. Confluent cells were split 1:5 with trypsin-EDTA (GIBCO) every 3-4 days.

For culture of cells on permeable polycarbonate filter supports (Millipore PCF, 0.4  $\mu$ m pore size, 30 mm diameter; Millipore Corp., Bedford, MA), normal and transformed cell lines were seeded at a density of  $7 \times 10^5$  cells per pre-wetted filter and cultured for 4-7 days. Cultures were fed every other day as well as the day before experimentation.

### Antibodies

The monoclonal and polyclonal anti-integrin antibodies used in the present study are listed in Table 1.

The rabbit polyclonal antibody raised against the human fibronectin receptor ( $\alpha_5\beta_1$ ) obtained from Telios Pharmaceuticals (La Jolla, CA) (Argraves et al., 1987) reacts under denaturing conditions with two polypeptides corresponding to  $\beta_1$  and its precursor in MDCK cells (see Results). The same two polypeptides are also detected by two

**Table 1. Anti-integrin antibodies**

| Specificity*            | Type† | Source         | Reference                       |
|-------------------------|-------|----------------|---------------------------------|
| $\alpha_5\beta_1$ (hu)  | Rb p  | Telios Pharm.‡ | Telios data sheet               |
| $\beta_1$ peptide (ch)  | Rb p  | Hynes          | (Marcantonio and Hynes, 1988)   |
| $\beta_1$ peptide (hu)  | Rb p  | Ruoslahti      | (Giancotti and Ruoslahti, 1990) |
| $\beta_1$ , AIB2 (mo)§  | Rt m  | Damsky         | (Hall et al., 1990)             |
| $\beta_3/\beta_5$ (hu)  | Rb p  | Telios Pharm.  | Telios data sheet               |
| $\beta_4$ (hu)          | Rb p  | Hemler         | Unpublished¶                    |
| $\alpha_2$ peptide (hu) | Rb p  | Hemler         | (Takada and Hemler, 1989)       |
| $\alpha_3$ peptide (ch) | Rb p  | Hynes          | (Hynes et al., 1989)            |
| $\alpha_4$ peptide (hu) | Rb p  | Hemler         | (Takada et al., 1989)           |
| $\alpha_5$ peptide (ch) | Rb p  | Hynes          | (Hynes et al., 1989)            |
| $\alpha_6$ , GoH3(hu)§  | Rt m  | Sonnenberg     | (Sonnenberg et al., 1987)       |
| $\alpha_6$ , J1B5 (mo)  | Rt m  | Damsky         | Unpublished                     |
| $\alpha_6$ peptide (ch) | Rb p  | Reichardt      | (Tamura et al., 1990)           |

\*Antibodies made against proteins or peptides based on sequences of human (hu), chicken (ch), or mouse (mo) integrins.

†Antibodies made in either rabbit (Rb) or rat (Rt) and either polyclonal (p) or monoclonal (m).

‡Telios Pharmaceuticals, La Jolla, CA, now a division of Gibco/BRL.

§Adhesion-blocking antibody.

¶Raised against the SDS-gel purified  $\beta_4$  subunit derived from affinity-purified  $\alpha_6\beta_4$  (M. Hemler, personal communication).

different rabbit polyclonal antisera directed against peptides derived from the cytoplasmic tails of chicken and human  $\beta_1$  obtained from Richard Hynes (Massachusetts Institute of Technology) (Marcantonio and Hynes, 1988) and Erkki Ruoslahti (La Jolla Cancer Research Center) (Giancotti and Ruoslahti, 1990) (data not shown). The rat monoclonal antibody AIB2 against mouse  $\beta_1$  obtained from Caroline Damsky (University of California, San Francisco) (Hall et al., 1990) immunoprecipitates only mature  $\beta_1$  and not its precursor (data not shown).

The rabbit polyclonal antiserum raised against the original vitronectin receptor ( $\alpha_v\beta_3$ ; Telios) (Suzuki, 1986) may also cross-react with  $\alpha_v\beta_5$  (Telios Technical Literature). This antiserum detects a single polypeptide under denaturing conditions in MDCK cells with a mobility corresponding to either the  $\beta_3$  or  $\beta_5$  subunit (Fig. 3).

Polypeptides precipitated from MDCK cells under nondenaturing conditions with the rat monoclonal antibody GoH3 against mouse  $\alpha_6$  (obtained from Arnout Sonnenberg, Netherlands Blood Center, Amsterdam) (Sonnenberg et al., 1987) were identical to those precipitated with another rat monoclonal anti- $\alpha_6$  (J1B5) obtained from Caroline Damsky, and a rabbit polyclonal anti- $\alpha_6$  cytoplasmic tail antiserum obtained from Lou Reichardt (University of California, San Francisco) (Tamura et al., 1990; data not shown). On the basis of these and other data described in Results, one of the polypeptides has been identified as  $\alpha_6$  and the other as  $\beta_4$  (see Results).

GoH3, J1B5 and AIB2 do not react with MDCK cell polypeptides under denaturing conditions.

Both the anti- $\beta_1$  antibody AIB2 and the anti- $\alpha_6$  antibody GoH3 have been reported to block cell adhesion to their respective ligands (Hall et al., 1990; Sonnenberg et al., 1988).

### Semi-thin frozen sections

Filter-grown transformed and non-transformed MDCK cells were processed for 0.5  $\mu\text{m}$  cryosections as described by Kendall et al. (1992). Briefly, cells on filters were rinsed with phosphate buffered saline containing 1 mM  $\text{CaCl}_2$  and 0.5 mM  $\text{MgCl}_2$  (PBS+), fixed in PLP (2% paraformaldehyde, 75 mM L-lysine, 10 mM  $\text{NaIO}_4$ ) (McLean and Nakane, 1974) for 1 hour and rinsed again. Filters were cut out of the filter holders, trimmed into 1 mm squares and embedded in gelatin. When the gelatin solidified, the filters were re-fixed, infiltrated in sucrose/PBS, and frozen onto specimen holders in freon precooled with liquid nitrogen, followed by immersion in liquid nitrogen. Semi-thin frozen sections (0.5-1.0  $\mu\text{m}$ ) were cut on an Ultracut microtome with a cryosectioning attachment (Reichert-Jung, Vienna, Austria) at  $-80^\circ\text{C}$ . Sections were collected in sucrose, and transferred to microscope slides (Superfrost Plus, Fischer Scientific, Boston, MA) or coverslips previously coated with gelatin and chromium potassium sulfate.

### Immunofluorescence

Indirect immunofluorescence was performed either on cryosections of filter-grown cells or on cells grown on filters that were fixed in PLP. For cryosections, sucrose was removed by rinsing three times in PBS lacking  $\text{Ca}^{2+}$  and  $\text{Mg}^{2+}$  (PBS-), and aldehyde groups blocked by quenching in 50 mM  $\text{NH}_4\text{Cl}$ /PBS(-) for 20-45 minutes. After further rinsing, non-specific binding sites were blocked with 0.2% gelatin/PBS(-) or 10% normal goat serum for 30-60 minutes (Kendall et al., 1992). For immunostaining, antibodies against the  $\beta_1$  (1:150, Telios),  $\beta_3$  (1:150, Telios) and  $\alpha_6$  subunits (GoH3) were used. Sections were incubated in the primary antibody for 45 minutes, rinsed, and incubated with fluorescein-conjugated secondary antibody directed against rabbit or rat (TAGO, Inc.; Burlingame, CA). They were then mounted in 90% glycerol/PBS(-) containing 0.1%  $N,N,N',N'$ -tetramethyl-*p*-phenylenediamine to reduce photobleaching, and viewed on a Zeiss Axiophot or Axioskop Microscope equipped with epifluorescence illumination. All images were photographed with T-MAX-400 film (Eastman Kodak Co., Rochester, NY).

Immunofluorescence of cells on filters was as described above, except that cells were quenched for 15 minutes with 1 mg/ml  $\text{NaBH}_4$ /PBS(-) followed by permeabilization for 4 minutes in 0.1% Triton X-100/PBS(-) (Bacallao et al., 1990). Filters were then cut into 5 mm squares and incubated cell side down on 50  $\mu\text{l}$  drops of 10% normal goat serum, followed by primary and secondary antibodies. Filters were mounted onto glass slides for confocal microscopy using nail-polish spacers as described by Bacallao (1990). A Bio-Rad MRC 600 confocal system in conjunction with a Zeiss Axiovert and PlanApo  $\times 63$  objective was used to image the cells in the  $xy$  plane at 1.0  $\mu\text{m}$  intervals ( $z$ -series). The raw images were transferred to a Macintosh format and contrast-adjusted using Adobe Photoshop (Adobe Systems, Mountain View, CA). All three images depicted for each antibody were contrast-adjusted and printed identically.

### Immunoprecipitation

Filter-grown cells were metabolically labeled from the basal compartment for 16-24 hours with 100  $\mu\text{Ci}$  of [ $^{35}\text{S}$ ]methionine (EXPRE $^{35}\text{S}^{35}\text{S}$ , New England Nuclear, Boston, MA) per filter chamber in MEM containing one-tenth the normal methionine concentration (Sigma, St. Louis, MO) supplemented with 5% FBS and 10 mM HEPES. An equal amount of medium lacking isotope was added to the apical compartment. Radiolabeled cells were then washed three times on ice with cold PBS(+). Filters were cut in half, removed from the filter holder, and placed in microfuge tubes. Cells were then extracted under non-denaturing or denaturing conditions. Extraction under non-denaturing conditions, which preserves  $\alpha\beta$  heterodimeric complexes, was carried out by adding 1 ml of extraction buffer (1% NP-40, 1% sodium deoxycholate, 0.5% SDS, 0.15 M NaCl, 10 mM Tris, pH 7.5, or 1% Triton X-100, 0.1% SDS, 0.15 M NaCl, 20 mM Tris, pH 8.6) containing protease inhibitors (10  $\mu\text{g}/\text{ml}$  aprotinin, 17.5  $\mu\text{g}/\text{ml}$  benzamidine, 1  $\mu\text{g}/\text{ml}$  antipain, 1  $\mu\text{g}$  pepstatin, and 0.2 mg/ml iodoacetamide) to microfuge tubes, and vortexing the samples briefly before inverting at  $0^\circ\text{C}$  for 30 minutes. For extraction of integrins under conditions that denature  $\alpha\beta$  heterodimers into individual  $\alpha$  and  $\beta$  subunits, filters were transferred to microfuge tubes and heated ( $95^\circ\text{C}$ , 3 minutes) in 0.5% SDS, 0.15 M NaCl, 20 mM Tris, pH 8.6, containing 0.2 mg/ml iodoacetamide. Samples were vortexed, mechanically sheared, and diluted fivefold with 1% Triton X-100, 0.15 M NaCl, 20 mM Tris, pH 8.6, containing 10  $\mu\text{g}/\text{ml}$  aprotinin, 17.5  $\mu\text{g}/\text{ml}$  benzamidine, 1  $\mu\text{g}/\text{ml}$  antipain and 1  $\mu\text{g}/\text{ml}$  pepstatin. Filters were removed by centrifugation (5 minutes, 15,000  $g$ ) and cell lysates transferred to new tubes and centrifuged again (20 minutes,  $0^\circ\text{C}$ ). In some cases, lysates were filtered through 0.45  $\mu\text{m}$  filter units (Ultrafree-MC Filters, Millipore Corporation, Bedford, MA).

For immunoprecipitation, extracts were incubated overnight with the primary antibody at  $4^\circ\text{C}$ . For rat monoclonal antibodies, rabbit anti-rat IgG (Sigma) was added at the same time as the primary antibody. Antigen-antibody complexes were recovered by adding Protein A-Trisacryl (Pierce Chemical Co., Rockford IL) and inverting for 2-4 hours at  $4^\circ\text{C}$ . Immunoprecipitates were then pelleted (15,000  $g$ , 15 seconds) and washed thrice in extraction buffer without protease inhibitors and once with 10 mM Tris, pH 8.6, to remove salts and detergent.

To analyze the precipitated polypeptides, Trisacryl beads were resuspended in electrophoresis sample buffer (200 mM Tris-HCl, pH 8.8, 5 mM EDTA, 15% sucrose, 0.1% bromophenol blue, 20 mM dithiothreitol, and 2% SDS) and heated at  $95^\circ\text{C}$  for 3-5 minutes. The samples were then alkylated with iodoacetamide for 15 minutes at  $37^\circ\text{C}$  and fractionated by SDS-gel electrophoresis according to the method of Laemmli (1970). Gels were fixed, impregnated with EN $^3$ HANCE (E.I. DuPont de Nemours & Co., Boston, MA), dried and exposed to preflashed KODAK X-OMAT film (Eastman Kodak Co., Rochester, NY).

Endoglycosidase H (Endo H; Boehringer Mannheim Biochemicals, Indianapolis, IN) digestion of integrins was performed as described

previously (Matlin, 1986). After immunoprecipitation of integrins under denaturing conditions, antigen was released from Triasacryl Protein A beads by heating (95°C, 3 minutes) in 100 µl 5 mM TES-NaOH, pH 7.4, 1% SDS followed by diluting tenfold with 0.2 M sodium citrate, pH 5.5, containing protease inhibitors. Protein A beads were then pelleted, the supernatant containing the released integrin was divided into two equal portions, and Endo H (25 milliunits/ml) was added to one portion. Both portions were then incubated at 37°C for 16 hours and the digested protein recovered by precipitation with an equal volume of 40% trichloroacetic acid for a minimum of 3 hours on ice. After centrifuging (30 minutes, 15,000 g), pelleted samples were processed for SDS-gel electrophoresis as described above.

### Surface labeling

For cell surface labeling with biotin, the high pH method of Gottardi and Caplan (1992) was used. After rinsing in PBS+, filters were rinsed once with TEA buffer (10 mM triethanolamine, 125 mM NaCl, 2 mM CaCl<sub>2</sub>, 0.5 mM MgCl<sub>2</sub>, pH 9.0). Freshly prepared sulfo-*N*-hydroxy-succinimide-biotin (sulfo-NHS-biotin, 0.5 mg/ml, Pierce) dissolved in TEA was added to each compartment to be biotinylated. Unlabeled compartments received TEA buffer. After incubating for 30 minutes on ice, monolayers were washed twice in ice-cold serum-free MEM, avoiding mixing of apical and basal washes. Filters were rinsed twice more with PBS(+), flooding the wells. Cells were extracted under non-denaturing conditions as described above with the exception that 10 mM glycine was added to the extraction buffer. After immunoprecipitation, antigen was released from the Triasacryl Protein A pellet by heating (95°C, 3 minutes) in 30 µl of 2% SDS and 20 mM Tris-HCl, pH 8.6. As a positive control, 5 µl was removed and prepared for SDS-gel electrophoresis. The remaining 25 µl were diluted with 250 µl of 1% Triton X-100, 0.15 M NaCl, and 20 mM Tris-HCl, pH 8.6. Biotinylated integrins were then precipitated with streptavidin-agarose (Pierce). Samples were inverted at 4°C overnight, washed and processed for SDS-gel electrophoresis.

### Transepithelial resistance

Transepithelial resistance was measured with a Millicell ERS (Millipore Corp., Bedford, MA).

### Adhesion assay

The adhesion assay was based upon the procedure of Ruoslahti and Hayman (1982).

Extracellular matrix proteins, bovine serum albumin (BSA), and poly-D-lysine for coating wells, were prepared as follows. Laminin (Upstate Biotechnologies, Inc. (UBI), Lake Placid, NY) and collagen IV (Collaborative Research, Inc., Bedford, MA), purified from the Engelbreth-Holm-Swarm mouse sarcoma, were thawed on ice before diluting in cold 0.1 M sodium bicarbonate, pH 8.3. Lyophilized human fibronectin and human vitronectin (Collaborative) were dissolved in PBS(-) to a concentration of 1 mg/ml, divided into aliquots, and stored at -20°C for up to one week. Rat-tail collagen I (UBI) was diluted in PBS(-) according to the manufacturer's directions. Bovine serum albumin (Sigma, Fraction V, no. A7906) was dissolved in PBS(-) to a concentration of 5% (w/v) and denatured at 70°C for 5 minutes with constant stirring in a water bath. The solution was filtered through a 0.45 µm syringe filter (Millipore) and aliquots stored at -20°C. Lyophilized, high molecular weight poly-D-lysine (Collaborative) was dissolved in 0.1 M sodium bicarbonate, pH 8.3, to 100 µg/ml.

On the day of the experiment, Dynatech (Chantilly, VA) Immulon 2 plates (96 well) were coated with 100 µl of extracellular matrix proteins diluted to various concentrations in 0.1 M sodium bicarbonate, pH 8.3. Standard controls for each assay included wells coated with 100 µl of 1% BSA/PBS(-), and 200 µl of 50 µg/ml poly-D-lysine/0.1 M sodium bicarbonate, pH 8.3. Wells were coated for 2 hours at 37°C/5% CO<sub>2</sub> during which time the plates were kept covered with Parafilm to prevent evaporation. Solutions were then aspirated

and the covered plates incubated further (30 minutes). Non-specific binding sites were blocked with 200 µl/well of 1% BSA/PBS(+) at 4°C for 2 hours. The plates were washed twice with 200 µl/well of PBS(+) before adding 50 µl/well of 1% BSA/serum-free MEM (with 10 mM HEPES, pH 7.4). For antibody perturbation experiments, the wells to be plated with cells received antibody containing BSA/serum-free MEM. In each assay, eight wells were used for each experimental condition. Four wells received cells (see below), while the other four were used for background measurements.

Subconfluent MDCK cells that had been passaged on the previous day were washed twice with PBS(-) and once with 4 mM EDTA-1 mM EGTA/PBS(-), incubated with 5 ml of the EDTA/EGTA solution for 40 minutes at 37°C/5% CO<sub>2</sub> to dissociate them into single cells, and collected by centrifugation. Cells were resuspended in 2-5 ml of serum-free S-MEM (Suspension MEM; GIBCO) containing 15 mM Hepes, pH 7.4. A suspension of 1×10<sup>5</sup> viable cells/50 µl was plated onto the coated plates. In antibody perturbation experiments, cells were incubated on ice for 30 minutes in the presence of the antibody before plating.

The plated cells were then incubated covered at 37°C/5% CO<sub>2</sub> for 90 minutes, the time necessary for MDCK to maximally adhere to laminin (data not shown). Plates were then gently washed twice with 200 µl/well of cold 0.5% BSA in PBS(+), twice with 200 µl/well of cold PBS(+), and then fixed with 100 µl/well of 100% methanol for 10 minutes. The methanol was removed and the plates allowed to air dry.

The plates were stained for 5 minutes with 100 µl/well 0.1% crystal violet filtered through a 0.22 µm filter unit (Millipore), washed four times with 200 µl/well of distilled water, and air-dried before dissolving the dye in 1% sodium deoxycholate (100 µl/well) for 10-20 minutes. The amount of staining, which is proportional to the number of attached cells, was measured with a Molecular Devices plate reader at 590 nm and the background reading for each well at 405 nm subtracted. In addition, the average absorbance of four wells without cells was measured and subtracted from the average of four wells with cells to yield the absorbance due to the adherent cells only. Each graph represents the data from three independent experiments.

## RESULTS

### MDCK cells express β<sub>1</sub>, β<sub>3</sub> and β<sub>4</sub> integrins

When extracts of MDCK cells labeled overnight with [<sup>35</sup>S]methionine were immunoprecipitated with a polyclonal antibody directed against the β<sub>1</sub> integrin subunit (Table 1) under conditions that do not dissociate the α and β chains, and the immunoprecipitates analyzed by SDS-gel electrophoresis and fluorography, five polypeptides with relative molecular masses between 110,000 and 170,000 were detected (Fig. 1, lane 1). One of these, designated α<sub>x</sub>, was often poorly resolved from the other polypeptides (Fig. 1, compare lanes 1 and 6). Occasionally, a polypeptide of slightly less than 200 kDa was also observed (Fig. 1, lanes 4 and 6, arrowhead). When cells were extracted under denaturing conditions (see Materials and Methods) and precipitated, two polypeptides were seen (Fig. 1, lane 2). The faster migrating of these was apparently the biosynthetic precursor of β<sub>1</sub>, since digestion of immunoprecipitates with endoglycosidase H caused a shift in the mobility of this band but not the more slowly migrating band (Fig. 1, lane 3). Under nonreducing conditions, the polypeptide identified as mature β<sub>1</sub> shifted to a slightly faster mobility that coincided with the mobility of the Endo H precursor, consistent with the behaviour reported for β<sub>1</sub> from other cell types (data not shown).

To identify the other polypeptides, labeled cell extracts were

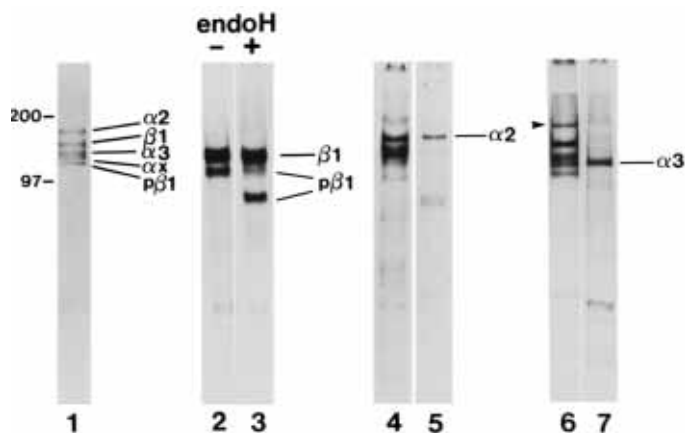

**Fig. 1.** Immunoprecipitation of  $\beta_1$  integrins from MDCK cells. MDCK cells cultured on permeable filter supports were labeled overnight with [ $^{35}\text{S}$ ]methionine and extracted under either nondenaturing (lanes 1, 4 and 6) or denaturing conditions (lanes 2, 3, 5 and 7). The extracts were immunoprecipitated with polyclonal antibodies against the  $\beta_1$ ,  $\alpha_2$  and  $\alpha_3$  integrin subunits. Nondenaturing conditions preserve interactions between the integrin  $\alpha$  and  $\beta$  subunits; under denaturing conditions, only the polypeptide that directly interacts with the antibody is precipitated. The immunoprecipitates were analyzed by SDS-gel electrophoresis and fluorography. The data in lanes 1, 2 and 3, 4 and 5, and 6 and 7 are all derived from separate experiments. Relative molecular masses ( $\times 10^{-3}$ ) determined by electrophoresis of marker proteins are indicated on the left side of lane 1; these are only approximately valid for the other lanes. Under nondenaturing conditions, a polyclonal anti- $\beta_1$  antibody precipitates five polypeptides (lane 1). Two of these are identified as  $\beta_1$  and its Endo-H-sensitive precursor ( $p\beta_1$ ) by immunoprecipitation under denaturing conditions and digestion with Endo H (lanes 2 and 3). Two others are identified as  $\alpha_2$  and  $\alpha_3$  by immunoprecipitation with monospecific anti-peptide antibodies (lanes 5 and 7, respectively); immunoprecipitates with anti- $\beta_1$  under nondenaturing conditions are shown in lanes 4 and 6 for comparison. The fifth polypeptide, which often appears to comigrate with  $\alpha_3$ , has not been identified ( $\alpha_x$ , lane 1). In some cases, a polypeptide of approximately  $200 \times 10^{-3}$ , which may be  $\alpha_1$  is also precipitated by anti- $\beta_1$  (lane 6, arrowhead).

immunoprecipitated with polyclonal anti-peptide and monoclonal antibodies against a number of  $\alpha$  subunits known to associate with  $\beta_1$  (see Table 1). Of these, polyclonal antibodies directed against  $\alpha_2$  and  $\alpha_3$  precipitated single polypeptides under denaturing conditions, whose mobilities corresponded to those of two of the five polypeptides precipitated by anti- $\beta_1$  under nondenaturing conditions (Fig. 1, lanes 4, 5 and 6, 7). Antibodies against  $\alpha_4$  and  $\alpha_5$  (Table I) failed to precipitate any bands in the expected molecular mass range, suggesting that these integrins were not expressed by MDCK cells. The possibility that the high molecular mass polypeptide sometimes detected (Fig. 1, lane 6, arrowhead) was the  $\alpha_1$  subunit was not tested because an appropriate antibody was not available.

To determine whether the fifth polypeptide ( $\alpha_x$ ) coprecipitated with  $\beta_1$  was  $\alpha_6$  (Fig. 1, lane 1), labeled extracts were precipitated under nondenaturing conditions with either GoH3 or J1B5, monoclonal antibodies against  $\alpha_6$  (Table 1). Under these conditions two polypeptides were detected. The apparent molecular mass of one of these corresponded to that expected for  $\alpha_6$  (Fig. 2, lane 1). Because the epitopes of GoH3 and J1B5

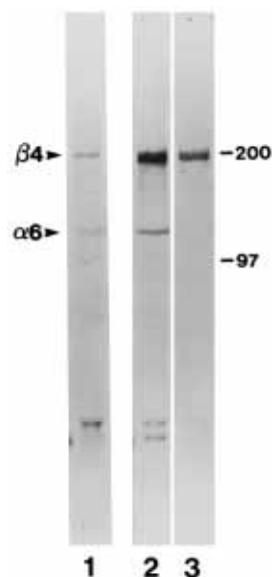

**Fig. 2.** Immunoprecipitation of  $\alpha_6\beta_4$  from MDCK cells. Labeled MDCK cells were extracted under nondenaturing and denaturing conditions and immunoprecipitated with monoclonal antibody GoH3 to the  $\alpha_6$  subunit (lane 1) and polyclonal antibody to the  $\beta_4$  subunit (lanes 2 and 3). Relative molecular masses ( $\times 10^{-3}$ ) are indicated on the right. Under nondenaturing conditions, both anti- $\alpha_6$  and anti- $\beta_4$  precipitate the same two polypeptides whose mobilities correspond to those of  $\alpha_6$  and  $\beta_4$  (lanes 1 and 2). Under denaturing conditions, anti- $\beta_4$  precipitates a closely spaced doublet corresponding to  $\beta_4$  (lane 3).

are sensitive to SDS (unpublished observations), it was not possible to perform an immunoprecipitation under denaturing conditions. The mobility of the second polypeptide precipitated by anti- $\alpha_6$  corresponded to a molecular mass of approximately 200 kDa, suggesting that it was the integrin subunit  $\beta_4$ , which is known to associate with  $\alpha_6$  (Fig. 2, lane 1). This was confirmed using a polyclonal antibody against  $\beta_4$ . Under nondenaturing conditions this antibody precipitated the same two polypeptides while under denaturing conditions it precipitated only the 200 kDa polypeptide (Fig. 2, lanes 2 and 3). To provide additional evidence that no  $\alpha_6\beta_1$  was expressed by MDCK cells, labeled extracts were immunoprecipitated under nondenaturing conditions with anti- $\alpha_6$ , and the immunoprecipitates resolubilized and reprecipitated with polyclonal anti- $\beta_1$ . Under these conditions, no  $\beta_1$  was detected (data not shown).

Extracts of MDCK cells were also precipitated with a polyclonal antibody against the vitronectin receptor,  $\alpha_v\beta_3$ . Under nondenaturing conditions this antiserum precipitated two polypeptides whose apparent molecular masses (Fig. 3, lane 1) and shifts in mobility in the absence of reduction (data not shown) were characteristic of the  $\alpha_v$  and  $\beta_3$  subunits. Under denaturing conditions, only presumptive  $\beta_3$  was precipitated (Fig. 3, lane 2).

Based on these findings, we concluded that MDCK cells express the  $\alpha_2\beta_1$  and  $\alpha_3\beta_1$  heterodimers, but not  $\beta_1$  integrins with the  $\alpha_4$ ,  $\alpha_5$  or  $\alpha_6$  subunits. The identity of  $\alpha_x$ , which is precipitated by anti- $\beta_1$  under nondenaturing conditions, remains unclear. It is also possible that  $\alpha_1\beta_1$  is expressed under some conditions, but this has not yet been tested. The  $\alpha_6$  subunit is

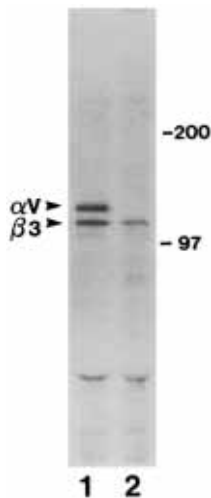

**Fig. 3.** Immunoprecipitation of presumptive  $\alpha_v\beta_3$  from MDCK cells. Labeled MDCK cells were extracted under nondenaturing and denaturing conditions and immunoprecipitated with a polyclonal antibody to a vitronectin receptor. Relative molecular masses ( $\times 10^{-3}$ ) are indicated on the right. Under nondenaturing conditions (lane 1) two polypeptides are precipitated, while only one is precipitated under denaturing conditions (lane 2). Based on mobilities, these polypeptides are tentatively identified as  $\beta_3$  and  $\alpha_v$ .

expressed, but exclusively in a complex with  $\beta_4$ . In addition, MDCK cells express another integrin, tentatively identified as  $\alpha_v\beta_3$ .

### Integrins in MDCK cells are found on both basal and lateral surfaces

All of the integrins expressed by MDCK cells are known to be receptors for the extracellular matrix (Hemler, 1991; Hynes, 1992; Ruoslahti, 1991). As such, they should be localized to the basal plasma membrane. However, recent evidence suggests that integrins are also on the lateral surface in some epithelial cells where they may participate in cell-cell interactions (Carter et al., 1990; Larjava et al., 1990; Symington et al., 1993). To determine where integrins are found in MDCK cells,  $\beta_1$ ,  $\beta_3$  and  $\beta_4$  integrins were localized by immunofluorescence microscopy. Localization of both  $\beta_1$  integrins and  $\alpha_v\beta_3$  was accomplished with polyclonal antisera directed against the  $\beta$  subunits;  $\alpha_6\beta_4$ , on the other hand, was localized using the GoH3 monoclonal antibody against  $\alpha_6$ .

As shown in Fig. 4, staining of frozen sections revealed that all three groups of integrins were localized to not only the basal but also the lateral aspects of the plasma membrane (Fig. 4A, E and I). These findings were confirmed and extended by confocal microscopy (Fig. 4B-D, F-H and J-L). Using this technique, staining of the integrins on the basal surface was in no case localized to focal adhesions but instead appeared to be unevenly distributed with no apparent pattern. The basal staining was most intense with GoH3 and less with anti- $\beta_1$  (Fig. 4D and H); anti- $\beta_3$  staining, on the other hand, was more finely granular and concentrated near the cell borders (Fig. 4L). On the lateral surfaces, staining with all three antibodies appeared intense (Fig. 4C, G and K). The lateral staining with anti- $\alpha_6$ , and to a lesser extent anti- $\beta_1$ , appeared somewhat punctate, suggesting focal concentration of the integrins (Fig. 4C and G). With all the antibodies, staining on the apical

surfaces appeared faint. However, it was difficult to decide if this represented a low concentration of apical integrins, or simply background from the primary antibodies.

The polar distribution of the integrins was also examined biochemically by surface biotinylation. MDCK cells on permeable supports were labeled overnight with [ $^{35}$ S]methionine and then treated from either the apical or basolateral surfaces, or both, with sulfo-NHS biotin. After immunoprecipitation of integrins, the biotinylated proteins were recovered with streptavidin-agarose and analyzed by SDS-gel electrophoresis and fluorography. As illustrated in Fig. 5, in all cases biotinylated integrins were detected only basolaterally (b) and not apically (a), consistent with the immunolocalization data. The intensity of the bands biotinylated from both sides of the monolayer (ab) was identical to that biotinylated basolaterally.

### MDCK cell integrins are receptors for laminin, collagen and vitronectin

To determine the ligand specificities of the MDCK cell integrins, adhesion assays were conducted on extracellular matrix-coated dishes with and without the addition of adhesion-blocking antibodies. Polylysine-coated dishes served as positive controls for complete cell attachment. MDCK cells attached well to Matrigel, an extract of the EHS sarcoma that is enriched in laminin-nidogen, collagen IV and proteoglycans (data not shown). They also attached readily to laminin (Fig. 6A), collagen IV (Fig. 6B) purified from the EHS sarcoma matrix, and collagen I (Fig. 6C). MDCK cells failed to adhere to dishes coated with heat-denatured bovine serum albumin. Adhesion to laminin, collagen IV and collagen I could be completely inhibited by the monoclonal antibody AIB2 against the  $\beta_1$  subunit (Fig. 6A-C). The blocking anti- $\alpha_6$  antibody GoH3 had no effect on adhesion of MDCK cells to laminin, even at concentrations that significantly inhibited the adhesion of other cells (data not shown) (Lee et al., 1992).

MDCK cells also adhered well to the serum adhesion protein vitronectin (Fig. 6D). This could not be blocked by anti- $\beta_1$ , consistent with vitronectin adhesion being mediated by  $\alpha_v\beta_3$  (Fig. 6D). In addition, MDCK cells attached to fibronectin-coated plates, but less efficiently than to other components (Fig. 7). This is clearly evident when adhesion to different con-

**Fig. 4.** Immunolocalization of integrins in MDCK cells. Frozen sections (A,E,I) or Triton-permeabilized whole mounts (B-D, F-H, J-L) were stained with antibodies to the  $\beta_1$  (A-D),  $\alpha_6$  (E-H), or  $\beta_3$  (I-L) subunits followed by fluorescent secondary antibodies. Frozen sections were examined in the fluorescence microscope; whole mounts were imaged with a confocal laser scanning microscope. Bars, 10  $\mu$ m. In the frozen sections, it is apparent that staining of all three integrin subunits is primarily basolateral. In (A) and (E) the lateral staining is more prominent because the basal fluorescence is slightly out-of-focus (arrows). In addition, staining with the anti- $\alpha_6$  antibody (E) is more intense because the section is thicker (1.0  $\mu$ m vs 0.5  $\mu$ m in (A) and (I)). In (I) anti- $\beta_3$  stains the basal (arrow) and lateral surfaces; f indicates the filter in this image. In confocal optical sections, only slight staining is apparent at the apical surfaces (ap) with all three antibodies (B,F,J). In (B) and (F) lateral staining is evident where the optical section has penetrated just below the apical surface. Note the focal concentration of  $\alpha_6$  integrin on the lateral (la) surface (G) and the granular (L) to matt-like (H) staining of the basal (ba) surface with the  $\beta_3$  and  $\alpha_6$  antibodies, respectively.

centrations of fibronectin and laminin are compared. Adherence to laminin is maximal at 1.5  $\mu\text{g}$ , while adherence to fibronectin is barely saturated at 6.0  $\mu\text{g}$  (Fig. 7A). Adhesion

to fibronectin was not inhibited by anti- $\beta_1$ , suggesting that it was also mediated by  $\alpha_v\beta_3$  (Fig. 7B).

In summary, adhesion assays and antibody inhibition exper-

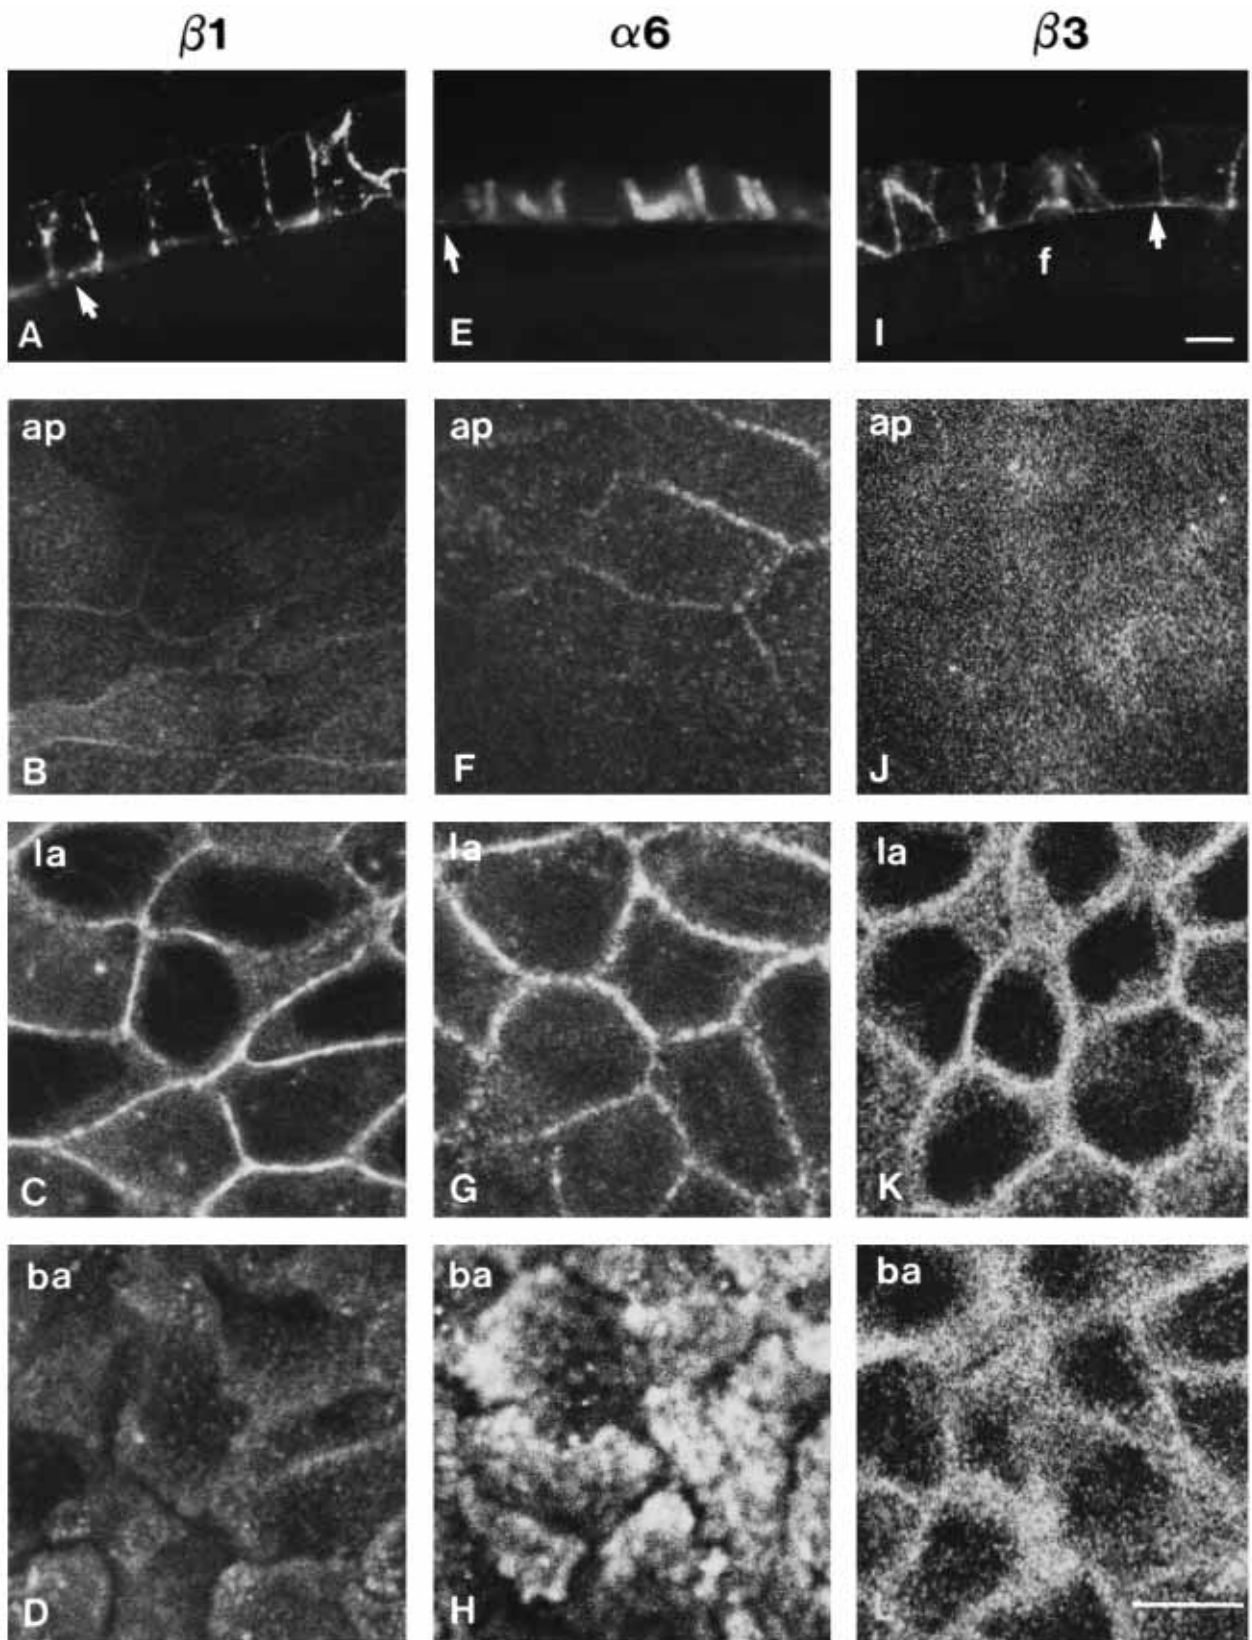

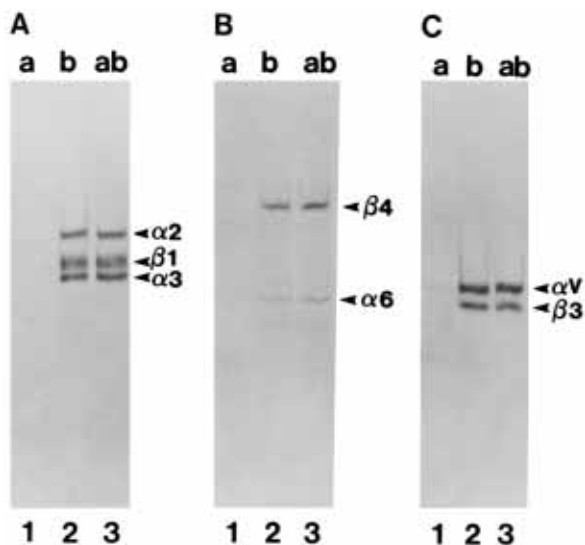

**Fig. 5.** Surface labeling of MDCK cell integrins. MDCK cells cultured on permeable supports were labeled overnight with [ $^{35}$ S]methionine. Replicate filter chambers were then reacted from the apical (a), basolateral (b), or apical and basal (ab) sides of the cell monolayer with sulfo-NHS biotin. The cells were extracted under non-denaturing conditions and immunoprecipitated with polyclonal anti- $\beta_1$  (A), monoclonal GoH3 anti- $\alpha_6$  (B), or polyclonal anti-vitronectin receptor (C). Immunoprecipitates were resolubilized and reprecipitated with streptavidin/agarose to capture the surface biotinylated proteins. As shown in (A), (B) and (C),  $\beta_1$ ,  $\beta_4$  and  $\beta_3$  integrins can be detected from only the basolateral surface (compare lanes 1 with lanes 2). Because no integrins can be detected on the apical surface, the intensities of the bands resulting from biotinylation from both sides of the filter chamber (ab) are identical to those due to basolateral biotinylation (b). Note also that the  $\beta_1$  precursor ( $p\beta_1$ , see Fig. 1) is not detected by biotinylation (A, lanes 2 and 3), confirming that it is an intracellular form of the protein.

iments indicated that MDCK cells adhere to components of the basal lamina and to collagen I via  $\beta_1$  integrins. They also adhere readily to vitronectin, most likely through the  $\alpha_v\beta_3$  vitronectin receptor, but less well to fibronectin. These findings, along with the observations that the anti- $\beta_1$  antibody AIB2 has no effect on fibronectin adhesion and that the anti- $\alpha_6$  antibody GoH3 does not block laminin adhesion, are consistent with our inability to identify either  $\alpha_5\beta_1$  (a fibronectin receptor) or  $\alpha_6\beta_1$  (a laminin receptor) in MDCK cell immunoprecipitates. They also suggest that MDCK cells do not express the fibronectin/vitronectin receptor  $\alpha_v\beta_1$ .

### Transformed MDCK cells exhibit altered integrin expression and localization

Our laboratory has recently described MDCK cell lines transformed by the Kirsten *ras* oncogene (Schoenenberger et al., 1991). These cells exhibit a lack of apical polarity and tendency to form multilayers which is correlated with the amount of *K-ras* expression. Nevertheless, the transformants develop functional tight junctions and retain basolateral proteins in regions of cell-cell contact (Schoenenberger et al., 1991). The formation of multilayers suggests that the balance between cell-substratum and cell-cell adhesion, which normally results in a monolayer, has been disturbed. To examine whether these changes in cell adhesion and polarity

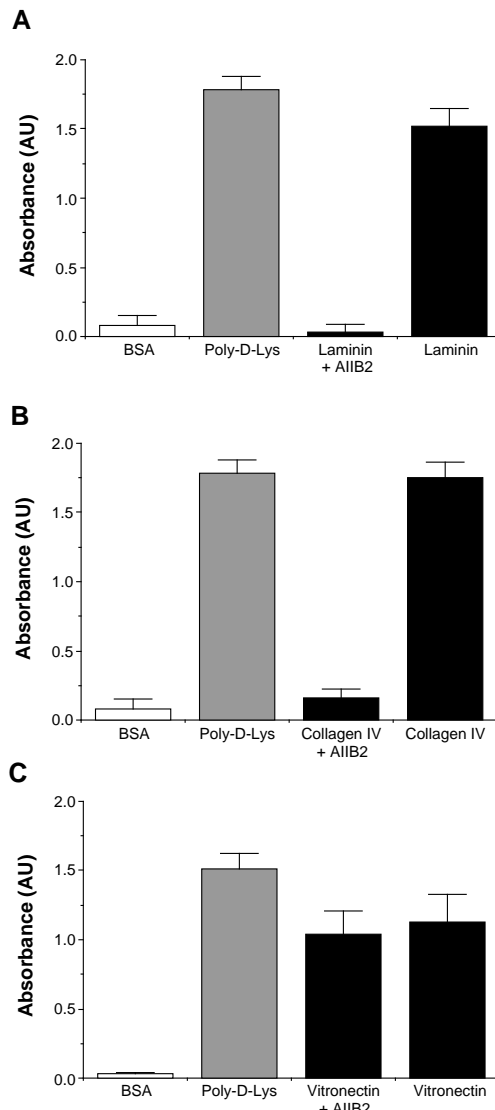

**Fig. 6.** MDCK cell adhesion to laminin, collagen IV and collagen I, but not vitronectin is blocked by AIB2, an anti- $\beta_1$  antibody. MDCK cells were challenged to adhere to heat-treated BSA, poly-D-lysine and 3  $\mu$ g/well laminin (A), 1.5  $\mu$ g/well collagen IV (B), 3  $\mu$ g/well collagen I (C), or 1  $\mu$ g/well vitronectin in the presence or absence of the function-blocking monoclonal antibody AIB2 diluted 1:10. The cells were allowed to adhere for 90 minutes before washing away non-adherent cells. Adherent cells were fixed, stained with crystal violet, and quantitated with a microplate reader. Each graph summarizes three separate trials. Bars represent standard error of the means. AU, arbitrary units.

could be correlated with alterations in integrin expression, we compared the integrin composition of the transformed cell lines with that of normal MDCK cells.

Three lines of transformed MDCK cells as well as the control cell line C6 were labeled overnight with [ $^{35}$ S]methionine, extracted under non-denaturing conditions, and immunoprecipitated with polyclonal anti- $\beta_1$ . Under these conditions, transformants showed a significant reduction in some of the  $\beta_1$  integrins correlated with the amount of *ras* expression (Fig. 8A). In higher-resolution gels, R5 cells were seen to almost completely lack two polypeptides with the highest mobility



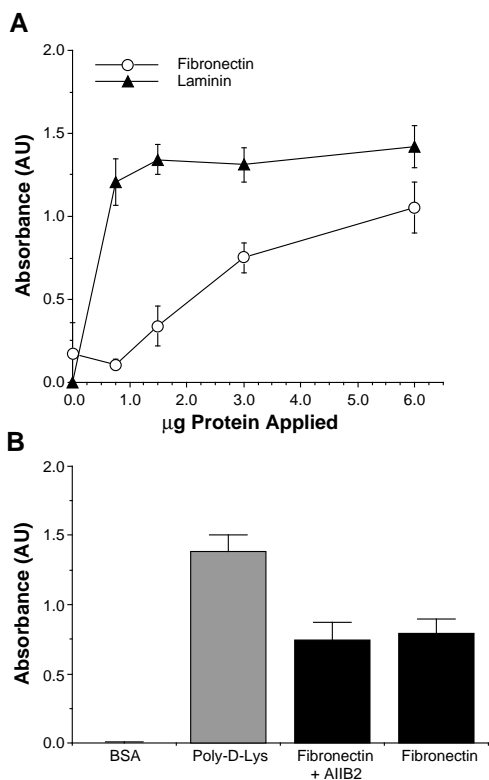

**Fig. 7.** MDCK cell adhesion to fibronectin is inefficient and is not inhibited by the anti- $\beta_1$  antibody AIB2. (A) To determine the amount of fibronectin necessary for maximal attachment, MDCK cells were plated onto various quantities of fibronectin ( $\circ$ ) in 96-well plates. As a comparison, they were also plated onto plates coated with different amounts of laminin ( $\blacktriangle$ ). After a 90 minute incubation non-adherent cells were washed away and adherent cells were fixed with crystal violet before being stained and quantitated with a microplate reader. Note that maximal MDCK cell adhesion occurs at very low concentrations of laminin while adhesion to fibronectin is relatively inefficient. (B) MDCK cells were challenged to adhere in 96-well plates to heat-treated BSA, poly-D-lysine or 3  $\mu$ g fibronectin/well in the presence or absence of a 1:10 dilution of AIB2. The cells were allowed to adhere for 90 minutes before washing, fixing, staining with crystal violet and quantitating with a microplate reader. Each graph summarizes three separate trials. Bars represent standard error of the means. Note that adhesion to fibronectin is not perturbed by the AIB2 antibody.

(Fig. 8B). On the basis of previous experiments (see Fig. 1), the fastest migrating of these was identified as the  $\beta_1$  biosynthetic precursor ( $p\beta_1$ ). The other band corresponded to  $\alpha_x$ , the putative integrin subunit precipitated by anti- $\beta_1$  (Fig. 1). The absence of the  $\beta_1$  precursor was more clearly evident in immunoprecipitates carried out under denaturing conditions (Fig. 8C). In this case, anti- $\beta_1$  precipitated two polypeptides from normal cells but only one from the transformant (Fig. 8C).

With integrins, as with many other oligomeric proteins, transport out of the endoplasmic reticulum to the plasma membrane is dependent on formation of the correct oligomeric structure: namely, the  $\alpha\beta$  heterodimer (Bodary and McLean, 1990; Cheresch and Spiro, 1987; Hemler, 1991; O'Toole et al., 1989). Normal MDCK cells appear to synthesize more  $\beta_1$  subunits than compatible  $\alpha$  subunits. This excess, which is

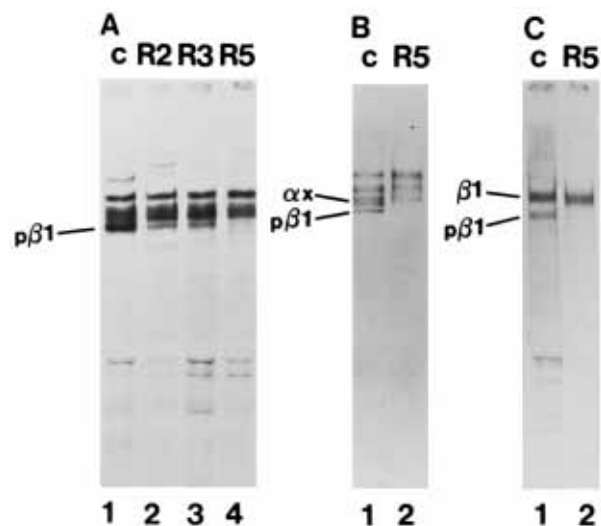

**Fig. 8.** Immunoprecipitation of  $\beta_1$  integrins from transformed MDCK cells. Normal MDCK cells (C6, c) and K-*ras* transformed lines (R2, R3, R5) cultured on permeable supports were labeled overnight with [ $^{35}$ S]methionine, extracted under nondenaturing (A,B) or denaturing (C) conditions, and immunoprecipitated with a polyclonal anti- $\beta_1$  antibody. In A, different transformed lines that express increasing amounts of *ras* p21 (R2<R3<R5) show a gradual loss of polypeptides comigrating with the  $\beta_1$  precursor ( $p\beta_1$ , compare control lane 1 with lanes 2-4). In more favourable gels (B), the transformant R5 can be seen to lack  $\alpha_x$  and express diminished amounts of the  $\beta_1$  precursor ( $p\beta_1$ ). The latter is even more evident when immunoprecipitations are conducted under denaturing conditions (C). Only one major polypeptide corresponding to mature  $\beta_1$  is precipitated by anti- $\beta_1$  from R5 cells, while both mature  $\beta_1$  and the  $\beta_1$  precursor are precipitated from the C6 controls.

evident as the Endo-H-sensitive  $\beta_1$  detected under denaturing conditions (Fig. 1, lanes 2,3), apparently permits all of the  $\alpha$  subunits that can associate with  $\beta_1$  to form heterodimers and be transported to the plasma membrane. In transformed MDCK cells this does not seem to be the case, since little or no Endo-H-sensitive  $\beta_1$  precursor can be detected (Fig. 8C).

If excess  $\beta_1$  is not present in transformed cells, then it is possible that not all of the synthesized  $\alpha$  subunits are able to exit from the endoplasmic reticulum. To test this, labeled extracts from transformed and normal cells were immunoprecipitated under denaturing conditions with antibodies against the  $\alpha_2$  and  $\alpha_3$  subunits. In the case of  $\alpha_2$ , only one Endo-H-resistant polypeptide was detected in both normal and transformed cells (data not shown). In the case of  $\alpha_3$ , on the other hand, two polypeptides were seen in the transformed cells as compared to one detected in normal cells (Fig. 9, lanes 1,2). Of the two, the more slowly migrating was sensitive to Endo H (Fig. 9, lanes 3,4).

Immunoprecipitation of the transformants with antibodies directed against the  $\alpha_v\beta_3$  vitronectin receptor and both the  $\alpha_6$  and  $\beta_4$  subunits uncovered no significant differences between the normal and transformed cells (data not shown).

Because changes in  $\beta_1$  integrins were detected in the transformed cells, it was possible that their surface expression was also altered. This was examined by immunofluorescence microscopy and surface labeling. As illustrated in Fig. 10,  $\beta_1$  integrins were distributed mainly to the parts of the plasma

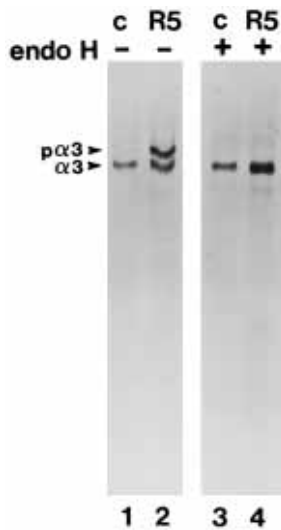

**Fig. 9.** Immunoprecipitation of  $\alpha_3$  from transformed MDCK cells. Normal MDCK cells (C6, c) and the K-*ras*-transformed line R5 cultured on permeable supports were labeled overnight with [ $^{35}$ S]methionine, extracted under denaturing conditions, and immunoprecipitated with polyclonal anti- $\alpha_3$  antibodies. Half of each sample was then digested with Endo H (lanes 3 and 4) or incubated without the enzyme (lanes 1 and 2). In normal MDCK cells, anti- $\alpha_3$  precipitates a single polypeptide (lane 1) whose mobility is unaltered by Endo H digestion (lane 3). In the R5 transformed line, however, two polypeptides are precipitated (lane 2); the more slowly migrating of these is sensitive to Endo H and comigrates with the Endo-H-resistant band after digestion (lane 4).

membrane involved in cell-cell contacts in multilayers of the R5 line. A small amount of staining could be seen on the apical surface in some cells (Fig. 10). For surface biotinylation, the R5 transformant cultured on permeable supports was reacted with sulfo-NHS biotin as described previously. To make sure that the labeling reagent had access to all cells, cultures were grown for only 4 days to make sure that multilayering had not yet commenced. Examination of parallel cultures by light microscopy of thick plastic sections indicated that the cells grown under these conditions formed a confluent monolayer (data not shown). Measurement of the transepithelial resistance of other cultures indicated that they were tight and thus not likely to permit the labeling reagent to penetrate from one side of the culture to the other (data not shown). When surface biotinylation was conducted under these conditions, both the  $\alpha_3$  and the  $\alpha_2$  subunits were detected on the basolateral cell surface together with  $\beta_1$  (Fig. 11, lane 5) as was also seen in the C6 control line (Fig. 11, lane 2). Surprisingly, however, a fraction of these integrins was also detected on the apical surface (Fig. 11, lane 4); as before, no integrins were detected on the apical plasma membrane of the control (Fig. 11, lane 1). When R5 cultures were biotinylated simultaneously from both the apical and basolateral sides (Fig. 11, lane 6), the intensities of the bands corresponded to approximately the sum of the intensities derived from separate apical and basal biotinylation. This indicated that the apical signal was actually due to apical integrins and not the result of leakage of biotinylation reagent from the apical to the basal compartment.

In summary, analysis of the integrin composition of transformed MDCK cells indicated that they expressed less of the

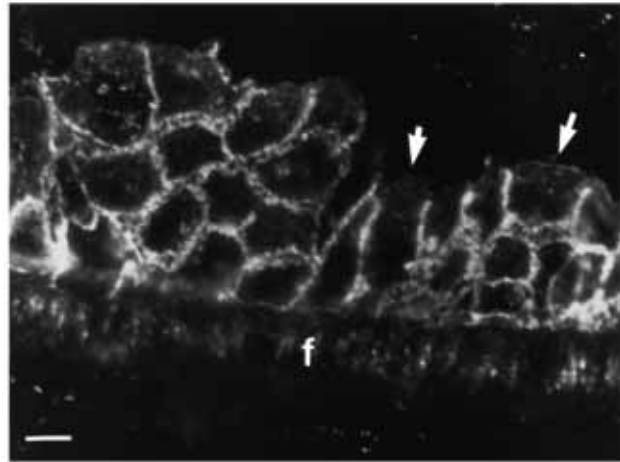

**Fig. 10.** Immunolocalization of the  $\beta_1$  integrin subunit in transformed MDCK cells. Frozen sections ( $0.5 \mu\text{m}$ ) of fixed R5 transformed cells cultured on permeable supports were stained with anti- $\beta_1$  antibodies and observed in the fluorescent microscope. Multilayers of cells can be seen attached to the filter substratum (f). The  $\beta_1$  subunit is localized predominantly to areas of cell-cell contact throughout the multilayer. Staining of the basal surface is also evident as an out-of-focus glare adjacent to the filter. In some cells, a small amount of staining can also be detected on the free or apical surface of the topmost layer of cells (arrows). Fluorescence within the filter is presumably due to blebbing of the basal plasma membrane of R5 cells. Bar,  $10 \mu\text{m}$ .

$\beta_1$  subunit relative to the amount of  $\alpha$  subunits. This apparently resulted in a change in the subunit balance such that Endo-H-sensitive  $\alpha_3$  but no Endo-H-sensitive  $\beta_1$  could be detected in the transformed cells. In addition, in gels with favourable resolution, no  $\alpha_x$  could be detected in the R5 transformant. Finally, in cultures of R5 transformants that had not yet formed multilayers, a significant amount of  $\alpha_2\beta_1$  and  $\alpha_3\beta_1$  could be detected not only on the basolateral domain but also on the apical domain by surface biotinylation.

## DISCUSSION

### Integrin expression in MDCK cells and the kidney

The results presented here establish that normal MDCK cells adhere to the substratum via a variety of integrins arrayed on the basolateral surface. These include the laminin and collagen receptors  $\alpha_2\beta_1$  and  $\alpha_3\beta_1$ , and the vitronectin receptor  $\alpha_v\beta_3$ . In addition, MDCK cells express  $\alpha_6\beta_4$  and possibly other integrin  $\alpha$  subunits that associate with  $\beta_1$ . Given that MDCK cells resemble cells of the kidney distal tubule (Meier and Insel, 1985), our findings are generally consistent with those of Korhonen et al. (1990a), who reported that human distal tubular cells express the  $\alpha_2$ ,  $\alpha_3$  and  $\alpha_6$  integrin subunits. Our observations disagree, however, with their conclusion that  $\beta_4$  is not expressed by kidney tubular cells and that, as a result,  $\alpha_6$  must form a heterodimer with  $\beta_1$ . In contrast, our immunoprecipitations under non-denaturing conditions with antibodies directed against either  $\alpha_6$  or  $\beta_4$  suggest that MDCK cells express  $\alpha_6$  exclusively in a complex with  $\beta_4$ . The conclusion that kidney epithelial cells express not only  $\beta_4$  but also  $\alpha_6$  is

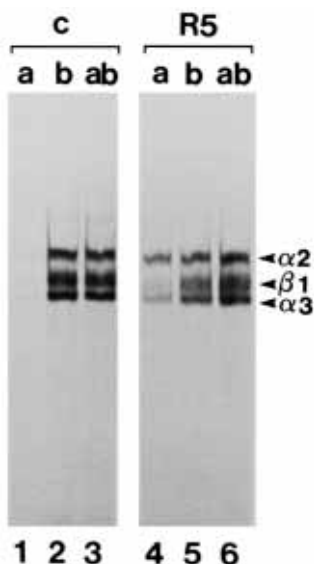

**Fig. 11.** Surface labeling of  $\beta_1$  integrins in transformed MDCK cells. Normal (C6,c) and R5 transformed MDCK cells cultured on permeable supports were labeled overnight with [ $^{35}\text{S}$ ]methionine. Replicate filter chambers were then reacted from the apical (a), basolateral (b), or apical and basolateral (ab) sides of the cell monolayer with sulfo-NHS biotin. The cells were extracted under nondenaturing conditions and immunoprecipitated with a polyclonal anti- $\beta_1$  antibody. Immunoprecipitates were resolubilized and reprecipitated with streptavidin agarose to capture the surface biotinylated proteins. In normal MDCK cells,  $\beta_1$  integrins can only be detected from the basolateral surface (compare lanes 1 and 2; see also Fig. 5A). In contrast, in R5 cells, both  $\alpha_2\beta_1$  and  $\alpha_3\beta_1$  can be detected not only from the basolateral side but also from the apical side (lanes 4 and 5). Note that the intensities of the bands representing biotinylation of both apical and basolateral compartments of R5 cultures (lane 6) appear to be the sum of the intensities of the apical bands and the basolateral bands (i.e. lanes 4+5=6). This indicates that biotinylation from the apical side is not due to leakage of the biotinylation reagent from the apical to basolateral compartment.

supported by the recent studies of Natali et al. (1992), who found that  $\alpha_6$  and  $\beta_4$  staining was evident in kidney tubules.

No polypeptides were immunoprecipitated from MDCK cells with antibodies against  $\alpha_4$  and  $\alpha_5$  subunits. While these data are not definitive, because we cannot be certain that the anti-peptide antibodies employed cross-react with the equivalent canine integrins, they are consistent with the observed adhesion preferences of MDCK cells. Both  $\alpha_4\beta_1$  and  $\alpha_5\beta_1$  are fibronectin receptors (Hemler, 1991; Hynes, 1992; Ruoslahti, 1991). However, not only do MDCK cells adhere relatively poorly to fibronectin, but this small adherence is not inhibited by a specific function-blocking antibody to  $\beta_1$ .

The identity of the fifth polypeptide ( $\alpha_x$ ) sometimes resolved in SDS-gels of anti- $\beta_1$  immunoprecipitates is unknown but is of great interest due to its apparent absence from transformed MDCK cells. We have not yet tested antibodies against  $\alpha_v$ ,  $\alpha_1$ ,  $\alpha_7$  and  $\alpha_8$ , which are known to associate with  $\beta_1$ . The unknown polypeptide is, however, not likely to be either  $\alpha_1$  or  $\alpha_7$  because these differ considerably in molecular mass from  $\alpha_x$  (Hemler, 1991). It is also probably not  $\alpha_v$ , a fibronectin receptor, because anti- $\beta_1$ -blocking antibodies do not inhibit MDCK cell adhesion to fibronectin. In addition, when

immunoprecipitates containing  $\alpha_v$  are electrophoresed on the same gel as  $\beta_1$  integrins,  $\alpha_x$  and  $\alpha_v$  do not co-migrate (unpublished results). At present we cannot exclude the possibility that this polypeptide is a splice variant or modified form of one of the other integrin  $\alpha$  subunits, although the data from denaturing immunoprecipitations would argue against this. Ultimately, identification of this polypeptide will depend on more detailed analysis by two-dimensional electrophoresis and examination of mRNAs.

The  $\beta_1$  integrins expressed in MDCK cells appear to be the sole receptors for adhesion to both laminin and collagens I and IV, since adhesion to these ligands is completely blocked by an antibody against the  $\beta_1$  subunit. Which  $\alpha$  subunits are involved is not clear, since  $\alpha_2$  and  $\alpha_3$  can each act as both laminin and collagen receptors (Chan and Hemler, 1993; Elices and Hemler, 1989; Elices et al., 1990; Gehlsen et al., 1988; Hemler, 1991; Hynes, 1992; Kirchofer et al., 1990; Languino et al., 1989; Ruoslahti, 1991; Staatz et al., 1989; Wayner and Carter, 1987). Other  $\alpha$  subunits, such as  $\alpha_x$  and the high molecular mass polypeptide possibly corresponding to  $\alpha_1$  might also be collagen or laminin receptors (Hall et al., 1990). Salas recently reported that MDCK cells express a 37/67 kDa laminin-binding protein (Salas et al., 1992). Whether this functions independently or in conjunction with laminin-binding integrins remains to be determined.

In addition to the  $\beta_1$  integrins, MDCK cells also express a receptor for vitronectin, which we have tentatively identified as  $\alpha_v\beta_3$ . This identification is based upon immunoprecipitation data using a commercial polyclonal antiserum directed against the vitronectin receptor  $\alpha_v\beta_3$ . Because subsequent characterization of lots of this antibody have indicated that it may also react with  $\alpha_v\beta_5$  (Telios Pharmaceuticals, Technical Literature), we cannot rule out the possibility that it is this integrin and not  $\alpha_v\beta_3$ , which is expressed by MDCK cells. In any case, it is likely that adherence to both vitronectin and fibronectin are mediated by the same integrin, since a blocking antibody against  $\beta_1$  has no effect on adhesion to either substratum.

The evidence for expression of a  $\beta_3$  integrin in kidney tubular cells is inconclusive. Korhonen et al. (1990b) were unable to detect the  $\beta_3$  subunit in human kidney using a monoclonal anti-human antibody. They did, however, find staining in the glomerulus and proximal tubule with a polyclonal anti-vitronectin receptor antiserum. It is possible that this polyclonal antiserum, which was purchased from the same source as the anti-vitronectin receptor antiserum used in our experiments (Korhonen et al., 1990b), actually reacted with  $\beta_5$  and not  $\beta_3$ . A recent report indicating that  $\beta_5$  is expressed in the glomerulus, proximal tubule and collecting duct makes this even more likely (Pasqualini et al., 1993).

#### On the role of $\alpha_6\beta_4$ in MDCK cells

Although  $\alpha_6\beta_4$  has been reported to be a laminin receptor in human colon carcinoma cells (Lee et al., 1992), in MDCK cells it does not seem to be responsible for adhesion to laminin. Even at high concentrations, GoH3, a blocking anti- $\alpha_6$  antibody, fails to inhibit attachment to laminin-coated substrata. It is possible that in MDCK cells,  $\alpha_6\beta_4$  is either inactive or mediates attachment to some other unidentified ligand. One possibility is kalinin, a member of the laminin family, which codistributes with  $\alpha_6\beta_4$  in keratinocytes (Marchisio et al., 1993). In the future, it will be important to

determine if MDCK cells synthesize or attach to kalinin or other alternative forms of laminin (Paulsson, 1993), which may serve as kidney-specific ligands for  $\alpha_6\beta_4$ .

Our observations concerning the  $\alpha_6$  subunit are significant because it has been implicated in the formation of the first polarized epithelium during kidney development. Ekblom and colleagues reported that GoH3 prevents differentiation of the condensed mesenchyme to an epithelium by inhibiting its interaction with the laminin A chain (Klein et al., 1988; Sorokin et al., 1990). Because development of the epithelium is also blocked by antibodies to the E8 fragment of laminin (Sorokin et al., 1990), whose receptor is  $\alpha_6\beta_1$  and not  $\alpha_6\beta_4$  (Sonnenberg et al., 1990b), it is believed that the integrin involved in the differentiation event is  $\alpha_6\beta_1$ . To our knowledge, however, this has not been directly proven. In fact it is likely that the situation in the developing kidney is even more complex, with more than one kind of laminin and more than a single  $\alpha_6$ -bearing integrin involved in epithelial polarization.

### Localization of integrins in MDCK cells

Localization of integrins in MDCK cells by immunofluorescence microscopy demonstrated that  $\beta_1$ ,  $\beta_3$  or  $\beta_4$  (as revealed by an antibody to  $\alpha_6$ ) integrins are all found not only on the basal surface, but also on the lateral surface. It is possible that this distribution occurs because there are insufficient ligands deposited on the basal substratum to interact with the cell surface integrins; under these conditions the uncomplexed integrins might remain diffusely distributed over both the basal and lateral surfaces. Our results also do not rule out the possibility that there are extracellular matrix proteins between the cells to which the integrins could attach, although we have not detected any ultrastructurally.

Alternatively, the lateral integrins could be involved in cell-cell interactions. Although the integrins of three  $\beta$ -subunit families found in MDCK cells are primarily known as receptors for extracellular matrix molecules, there is considerable evidence that some of them also participate in cell-cell interactions (Carter et al., 1990; Larjava et al., 1990; Symington et al., 1993). Studies of keratinocytes, in particular, have implicated  $\alpha_2\beta_1$  and  $\alpha_3\beta_1$  in cell-cell adhesion (Carter et al., 1990; Larjava et al., 1990; Symington et al., 1993). Both have been localized to regions of cell-cell contacts, and antibodies against  $\beta_1$  cause cells to detach from each other in suspension culture and when adherent to a vitronectin substratum (Carter et al., 1990; Larjava et al., 1990). More recently, biochemical experiments have suggested that keratinocyte  $\alpha_2\beta_1$  and  $\alpha_3\beta_1$  might interact, implying that they participate in heterotypic cell-cell contacts (Symington et al., 1993). Because MDCK cells express both of these integrins, it will be of great interest to determine whether function-blocking anti- $\beta_1$  antibodies disrupt cell-cell as well as cell-substratum contacts.

The localization of  $\alpha_6\beta_4$  in MDCK cells is of particular interest. In skin and cornea,  $\alpha_6\beta_4$  is found exclusively in hemidesmosomes where it may interact both with the extracellular anchoring filaments and the intermediate filament cytoskeleton (Quaranta and Jones, 1991; Sonnenberg et al., 1991; Stepp et al., 1990). In MDCK cells, which do not form hemidesmosomes,  $\alpha_6\beta_4$  is found not only on the basal surface, where it is distributed unevenly over the entire surface, but also on the lateral surface, where its distribution is interrupted and

possibly focal. Given the propensity of  $\alpha_6\beta_4$  to interact with hemidesmosomes on the basal surface of external epithelia, it is tempting to speculate that in MDCK cells, the  $\alpha_6\beta_4$  found on both the basal and lateral surface also participates in junctional complexes involving intermediate filaments. Resolution of this issue will require ultrastructural immunolocalization.

### Integrins and transformation

Our results demonstrate that transformed MDCK cells, while generally displaying the same integrin profile as normal MDCK cells, have some deficiencies in the expression and localization of  $\beta_1$  integrins. In addition to lacking  $\alpha_x$ , transformed MDCK cells do not express significant amounts of the Endo-H-sensitive  $\beta_1$  precursor. In normal MDCK cells an excess of  $\beta_1$  is synthesized relative to the stoichiometric amounts of  $\alpha$  subunits. All of the synthesized  $\alpha$  subunits are then able to associate with  $\beta_1$  and exit the endoplasmic reticulum on their way to the plasma membrane (Hemler, 1991). Although we have not localized  $\beta_1$  to the endoplasmic reticulum in MDCK cells, this scenario is consistent not only with present knowledge of glycoprotein transport and processing (Hurtley and Helenius, 1989), but also with our surface labeling data showing only mature  $\beta_1$  at the cell surface. This interpretation is also consistent with the lack of Endo-H-sensitive precursors of  $\alpha_2$  and  $\alpha_3$  in normal cells. Because the amount of  $\beta_1$  is relatively less in transformed MDCK cells,  $\alpha$  subunits compatible with  $\beta_1$  presumably compete for available  $\beta_1$  on the basis of affinities. Under these circumstances,  $\alpha_2$  seems to win out over  $\alpha_3$  in the race for a partner, resulting in some  $\alpha_3$  being left behind as an Endo-H-sensitive precursor. Interestingly, the  $\alpha_6$  subunit does not seem to even enter the race for  $\beta_1$ , although it can associate with it in other cells. Instead, it appears to have such a great affinity for  $\beta_4$  that in the normal cells, where excess  $\beta_1$  remains in the endoplasmic reticulum, no  $\alpha_6\beta_1$  is detectable.

The effect of the disturbance in processing and transport of  $\beta_1$  integrins that accompanies transformation on MDCK cell differentiation is difficult to assess. If the morphogenesis of polarized epithelial cells is dependent only qualitatively on the complement of integrins expressed on the cell surface, then this apparently minor alteration would not be expected to be important. If, on the other hand, correct morphogenesis depends on the exact balance of various integrins at the plasma membrane, then a change in relative amounts could be quite significant. Current experiments in our laboratory are attempting to address this issue.

In multilayers of the R5 transformant, there was only a small amount of apical staining by antibodies to  $\beta_1$  that did not seem to exceed the amount of apical  $\beta_1$  staining seen in the normal cells. This was consistent with the previous observation that proteins that are usually apical are randomly distributed in the transformed cells while normally basolateral proteins such as the  $\text{Na}^+, \text{K}^+$ -ATPase are found on the basal and lateral domains (Schoenenberger et al., 1991). In contrast, significant quantities of both  $\alpha_2\beta_1$  and  $\alpha_3\beta_1$  were detected on the apical surface by biotinylation in R5 cultures that had not yet formed multilayers while nothing was found apically with the same technique in normal cells.

The discrepancy between the immunofluorescence and biochemical data is difficult to explain. One possibility is that the polarity of the transformed cells is not uniform and the signal

from some completely depolarized cells skewed the biotinylation data. Alternatively, surface biotinylation could simply be more sensitive than immunofluorescence. A third explanation is that significantly more integrins are found on the apical surface in monolayers of the R5 line than on multilayers.

If there is mislocalization of  $\beta_1$  integrins in the transformed cells, then it may have come about through a variety of mechanisms. Basolateral proteins are known to polarize slowly in MDCK cells after the formation of cell-substratum and cell-cell contacts (Rodriguez-Boulant and Nelson, 1989). In the transformant, it is possible that the  $\beta_1$  integrins had not yet shifted from a random to a basolateral distribution at the time when the surface labeling was conducted, even though the monolayer was electrically tight. Another possibility is that the localization of different integrins depends on the localization of their ligands. Thus, it is possible that transformation causes laminin or collagen to be secreted randomly from both sides of the cells, with the integrins simply following their lead. This option can be tested by examining integrin localization in transformed cells cultured on exogenous extracellular matrix proteins. Indeed, preliminary experiments have suggested that Matrigel may partially revert some aspects of the transformed phenotype (A. Zuk and K. S. Matlin, unpublished results). Conversely, if transformation leads to mistargeting of integrins to the apical surface, then these cells may not adhere properly to the basal extracellular matrix. Such weak attachment to the substratum might then make cell-cell contacts paramount, leading to multilayering, and signalling a loss of apical polarity.

Numerous changes in both integrin expression and localization have been previously noted in both tumor cells and oncogenically transformed cells in culture. In tumors, reduced expression of some integrins normally associated with the well-differentiated phenotype, such as  $\alpha_2\beta_1$ , and increased expression of others, such as  $\alpha_v\beta_3$ , are correlated with cellular dedifferentiation, loss of polarity and increased invasiveness (Koretz et al., 1991; Koukoulis et al., 1991; Pignatelli et al., 1990, 1991; Weinel et al., 1992). Although no causal relationships have been established, it is suggested that changes in integrins might allow tumor cells to more readily cross the basal lamina and invade the interstitial matrix (Pignatelli and Bodmer, 1990; Ruoslahti, 1991). In cultured fibroblastic cells transformed by *v-src* or *v-ras*, the reduction in expression of  $\alpha_5\beta_1$  and two other unidentified integrins correlates well with observed decreases in binding to fibronectin-coated substrata (Plantefaber and Hynes, 1989). Conversely, overexpression of  $\alpha_5\beta_1$  in transformed Chinese hamster ovary cells results in the loss of some features of the transformed phenotype (Giancotti and Ruoslahti, 1990). Thus, it seems likely that changes in integrins actually drive generation of the transformed phenotype and are not just side-effects of oncogenesis.

### Integrins and epithelial cell polarization

In MDCK cells contact with the substratum is sufficient to initiate formation of an apical pole, which then reaches maturity after cell-cell contacts are established (Rodriguez-Boulant and Nelson, 1989). In suspension culture in normal medium, MDCK cells form aggregates that eventually develop into cysts (Wang et al., 1990a). Under these conditions, polarization of both apical and basolateral proteins can occur in the aggregates in the apparent absence of an extracellular matrix substratum,

but correct placement of the tight-junctional protein ZO-1 is dependent on deposition of collagen IV in the lumen following cyst formation (Wang et al., 1990a). In addition, in MDCK cells and other epithelia, the layering of a collagen gel over the apical surface results in dramatic reorganization of the cells into tubular structures and cysts, and inversion of the axis of polarity in response to the new situation (Hall et al., 1982; Nitsch and Wollman, 1980; Wang et al., 1990b; Chambard et al., 1981 p. 540). Finally, as discussed previously, events mediated by a laminin-integrin interaction are important in polarization of the murine kidney epithelium during development (Klein et al., 1988; Sorokin et al., 1990).

From all of these phenomena, two themes emerge. One is that extracellular matrix in general, and laminin and collagen in particular, are important for the correct morphogenesis and polarization of an epithelium. Second, cell-substratum and cell-cell contacts appear to be interdependent, sometimes working together and at other times, in the absence of the other, working alone while performing the other's function (Rodriguez-Boulant and Nelson, 1989). Thus, apical polarity can form in isolated attached cells in the absence of cell-cell contacts, but fully develops only with the cooperation of cell-cell adhesion. Conversely, when contact with the substratum is missing, as in suspended aggregates of cells, then polarization can occur, but requires the synthesis of and interaction with extracellular matrix proteins to reach maturity (Wang et al., 1990a).

Our results demonstrate that MDCK cells depend on integrins for interaction with both laminin and collagen, as well as with vitronectin. Integrins are, therefore, clearly important in polarization. In addition, our observations raise the possibility that integrins also participate in cell-cell interactions. Thus, the interdependence of cell-substratum and cell-cell contacts in epithelial polarization could be due at least partially to the fact that the integrins participate in both. Future work in our laboratory will examine the validity of this hypothesis.

We are very grateful to Martin Hemler, Richard Hynes, Caroline Damsky, Erkki Ruoslahti, Lou Reichardt and Arnout Sonnenberg for their generous gifts of antibodies. Martin Hemler, Vito Quaranta and Art Mercurio also provided useful advice. This work was supported by a Shannon Award from the NIDDK, National Institutes of Health to K. S. Matlin and an award from the Paul Blümel Stiftung to C.-A. Schoenenberger.

### REFERENCES

- Argraves, W. S., Suzuki, S., Arai, H., Thompson, K., Pierschbacher, M. D. and Ruoslahti, E. (1987). Amino acid sequence of the human fibronectin receptor. *J. Cell Biol.* **105**, 1183-1190.
- Arnout, M. A. (1990). Structure and function of the leukocyte adhesion molecules CD11/CD18. *Blood* **75**, 1037-1050.
- Bacallao, R., Bomsel, M., Stelzer, E. and De Mey, J. (1990). Guiding principles of specimen preservation for confocal fluorescence microscopy. In *Handbook of Biological Confocal Microscopy* (ed. J. B. Pawley), pp. 197-205. Plenum Press, New York.
- Bodary, S. C. and McLean, J. W. (1990). Expression of recombinant platelet glycoprotein IIb-IIIa results in a functional fibrinogen-binding complex. *J. Biol. Chem.* **264**, 18859-18862.
- Boll, W., Partin, J. S., Katz, A. I., Caplan, M. J. and Jamieson, J. D. (1991). Distinct pathways for basolateral targeting of membrane and secretory proteins in polarized epithelial cells. *Proc. Nat. Acad. Sci. USA* **88**, 8592-8596.

- Carter, W. G., Wayner, E. A., Bouchard, T. S. and Kaur, P.** (1990). The role of integrins  $\alpha_2\beta_1$  and  $\alpha_3\beta_1$  in cell-cell and cell-substrate adhesion of human epidermal cells. *J. Cell Biol.* **110**, 1387-1404.
- Chambard, M., Gabrion, J. and Maucham, P. J.** (1981). Influence of collagen gel on the orientation of epithelial polarity: follicle formation from isolated thyroid cells and from preformed monolayers. *J. Cell Biol.* **91**, 157-166.
- Chan, B. M. C. and Hemler, M. E.** (1993). Multiple functional forms of the integrin VLA-2 can be derived from a single  $\alpha_2$  cDNA clone: Interconversion of forms induced by an anti- $\beta_1$  antibody. *J. Cell Biol.* **120**, 537-543.
- Cheresh, D. A. and Spiro, R. C.** (1987). Biosynthetic and functional properties of an arg-gly-asp-directed receptor involved in human melanoma cell attachment to vitronectin, fibrinogen, and von Willebrand factor. *J. Biol. Chem.* **262**, 17703-17711.
- Clark, R. A. F.** (1988). Overview and general considerations of wound repair. In *The Molecular and Cellular Biology of Wound Repair* (ed. R. A. F. Clark and P. W. Henson), pp. 3-33. Plenum Press, New York.
- Eklblom, P.** (1989). Developmentally regulated conversion of mesenchyme to epithelium. *FASEB J.* **3**, 2141-2150.
- Eklblom, P.** (1992). Renal development. In *The Kidney: Physiology and Pathophysiology, 2nd edn* (ed. D. W. Seldin and G. Giebisch), pp. 475-501. Raven Press, New York.
- Elices, M. J. and Hemler, M. E.** (1989). The human integrin VLA-2 is a collagen receptor on some cells and a collagen/laminin receptor on others. *Proc. Nat. Acad. Sci. USA* **86**, 9906-9910.
- Elices, M. J., Urry, L. A. and Hemler, M. E.** (1990). Receptor functions for the integrin VLA-3: Fibronectin, collagen, and laminin binding are differentially influenced by arg-gly-asp and divalent cations. *J. Cell Biol.* **112**, 169-181.
- Gailit, J., Colflesh, D., Rabiner, I., Simone, J. and Goligorsky, M. S.** (1993). Redistribution and dysfunction of integrins in cultured renal epithelial cells exposed to oxidative stress. *Amer. J. Physiol.* **264**, F149-F157.
- Gehlsen, K. R., Dillner, L., Engvall, E. and Ruoslahti, E.** (1988). The human laminin receptor is a member of the integrin family of cell adhesion receptors. *Science* **241**, 1228-1229.
- Giancotti, F. G. and Ruoslahti, E.** (1990). Elevated levels of the  $\alpha_5\beta_1$  fibronectin receptor suppress the transformed phenotype of chinese hamster ovary cells. *Cell* **60**, 849-859.
- Goligorsky, M. S., Lieberthal, W., Racusen, L. and Simon, E. E.** (1993). Integrin receptors in renal tubular epithelium: new insights into pathophysiology of acute renal failure. *Amer. J. Physiol.* **264**, F1-F8.
- Gottardi, C. J. and Caplan, M. J.** (1992). Cell surface biotinylation in the determination of epithelial membrane polarity. *J. Tiss. Cult. Meth.* **14**, 173-180.
- Hall, D. E., Reichardt, L. F., Crowley, E., Holley, B., Moezzi, H., Sonnenberg, A. and Damsky, C. H.** (1990). The  $\alpha_1\beta_1$  and  $\alpha_6\beta_1$  integrin heterodimers mediate cell attachment to distinct sites on laminin. *J. Cell Biol.* **110**, 2175-2184.
- Hall, H. G., Farson, D. A. and Bissell, M. J.** (1982). Lumen formation by epithelial cell lines in response to collagen overlay: a morphogenetic model in culture. *Proc. Nat. Acad. Sci. USA* **79**, 4672-4676.
- Hemler, M. E.** (1991). Structures and functions of VLA proteins and related integrins. In *Receptors for Extracellular Matrix* (ed. J. A. McDonald and R. P. Mecham), pp. 256-300. Academic Press, San Diego.
- Humphries, M. J., Mould, A. P. and Yamada, K. M.** (1991). Matrix receptors in cell migration. In *Receptors for Extracellular Matrix* (ed. J. A. McDonald and R. P. Mecham), pp. 195-253. Academic Press, San Diego.
- Hurtley, S. M. and Helenius, A.** (1989). Protein oligomerization in the endoplasmic reticulum. *Annu. Rev. Cell Biol.* **5**, 277-307.
- Hynes, R. O., Marcantonio, E. E., Stepp, M. A., Urry, L. A. and Yee, G. H.** (1989). Integrin heterodimer and receptor complexity in avian and mammalian cells. *J. Cell Biol.* **109**, 409-420.
- Hynes, R. O.** (1992). Integrins: Versatility, modulation, and signaling in cell adhesion. *Cell* **69**, 11-25.
- Kendall, D., Lencer, W. and Matlin, K. S.** (1992). Cryosectioning of epithelial cells grown on permeable supports. *J. Tiss. Cult. Meth.* **14**, 181-186.
- Kirchofer, D., Languino, L. R., Ruoslahti, E. and Pierschbacher, M. D.** (1990).  $\alpha_2\beta_1$  Integrins from different cell types show different binding specificities. *J. Biol. Chem.* **265**, 615-618.
- Klein, G., Langegger, M., Timpl, R. and Eklblom, P.** (1988). Role of the laminin A chain in the development of epithelial cell polarity. *Cell* **55**, 331-341.
- Koretz, K., Schlag, P., Boumsell, L. and Möller, P.** (1991). Expression of VLA- $\alpha_2$ , VLA- $\alpha_6$ , and VLA- $\beta_1$  chains in normal mucosa and adenomas of the colon, and in colon carcinomas and their liver metastases. *Amer. J. Pathol.* **138**, 741-750.
- Korhonen, M., Ylanne, J., Laitinen, L. and Virtanen, I.** (1990a). The  $\alpha_1$ - $\alpha_6$  subunits of integrins are characteristically expressed in distinct segments of developing and adult human nephron. *J. Cell Biol.* **111**, 1245-1254.
- Korhonen, M., Ylanne, J., Laitinen, L. and Virtanen, I.** (1990b). Distribution of  $\beta_1$  and  $\beta_3$  integrins in human fetal and adult kidney. *Lab. Invest.* **62**, 616-625.
- Koukoulis, G. K., Virtanen, I., Korhonen, M., Laitinen, L., Quaranta, V. and Gould, V. E.** (1991). Immunohistochemical localization of integrins in the normal, hyperplastic, and neoplastic breast. *Amer. J. Pathol.* **139**, 787-799.
- Laemmli, U. K.** (1970). Cleavage of structural proteins during assembly of the head of bacteriophage T4. *Nature* **227**, 680-685.
- Languino, L. R., Gehlsen, K. R., Wayner, E., Carter, W. G., Engvall, E. and Ruoslahti, E.** (1989). Endothelial cells use  $\alpha_2\beta_1$  integrin as a laminin receptor. *J. Cell Biol.* **109**, 2455-2462.
- Larjava, H., Peltonen, J., Akiyama, S. K., Yamada, S. S., Gralnick, H. R., Uitto, J. and Yamada, K.** (1990). Novel function for  $\beta_1$  integrins in keratinocyte cell-cell interactions. *J. Cell Biol.* **110**, 803-815.
- Lee, E. C., Lotz, M. M., Steele, G. D. J. and Mercurio, A. M.** (1992). The integrin  $\alpha_6\beta_4$  is a laminin receptor. *J. Cell Biol.* **117**, 671-678.
- Marcantonio, E. E. and Hynes, R. O.** (1988). Antibodies to the conserved cytoplasmic domain of the integrin  $\beta_1$  subunit react with protein in vertebrates, invertebrates, and fungi. *J. Cell Biol.* **106**, 1765-1772.
- Marchisio, P. C., Cremona, O., Savoia, P., Pellegrini, G., Ortonne, J.-P., Verrando, P., Burgeson, R. E., Cancedda, R. and DeLuca, M.** (1993). The basement membrane protein BM600/Nicein codistributes with kalinin and integrin  $\alpha_6\beta_4$  in human cultured keratinocytes. *Exp. Cell Res.* **205**, 205-212.
- Matlin, K. S. and Simons, K.** (1984). Sorting of a plasma membrane glycoprotein occurs before it reaches the cell surface in cultured epithelial cells. *J. Cell Biol.* **99**, 2131-2139.
- Matlin, K. S.** (1986). Ammonium chloride slows transport of the influenza virus hemagglutinin but does not cause mis-sorting in a polarized epithelial cell line. *J. Biol. Chem.* **261**, 15172-15178.
- Matlin, K. S. and Caplan, M. J.** (1992). Epithelial cell structure and polarity. *The Kidney: Physiology and Pathophysiology* (ed. D. W. Seldin and G. Giebisch), pp. 475-501. Raven Press, New York.
- McLean, I. W. and Nakane, P. K.** (1974). Periodate-lysine-paraformaldehyde fixative. A new fixative for electron microscopy. *J. Histochem. Cytochem.* **22**, 1077-1083.
- McNeil, H., Ozawa, M., Kemler, R. and Nelson, W. J.** (1990). Novel function of the cell adhesion molecule uvomorulin as an inducer of cell surface polarity. *Cell* **62**, 309-316.
- Meier, K. E. and Insel, P. A.** (1985). Hormone receptors and response in cultured renal epithelial cell lines. In *Tissue Culture of Epithelial Cells* (ed. M. Taub), pp. 145-178. Plenum Press, New York.
- Natali, P. G., Nicotra, M. R., Bigotti, A. and Demartino, C.** (1992). Localization of the  $\alpha_6$  and  $\beta_4$  integrin subunits in normal human non-lymphoid tissues. *J. Cell Sci.* **103**, 1243-.
- Nelson, W. J. and Veshnock, P. J.** (1986). Dynamics of membrane-skeleton (fodrin) organization during development of polarity in Madin-Darby canine kidney epithelial cells. *J. Cell Biol.* **103**, 1751-1765.
- Nelson, W. J. and Veshnock, P. J.** (1987a). Ankyrin binding to (Na<sup>+</sup> + K<sup>+</sup>)ATPase and implications for the organization of membrane domains in polarized cells. *Nature* **328**, 533-536.
- Nelson, W. J. and Veshnock, P. J.** (1987b). Ankyrin binding to Na, K-ATPase and implications for organization of membrane domains in polarized cells. *Nature* **328**, 533-536.
- Nelson, W. J. and Hammerton, R. W.** (1989). A membrane-cytoskeletal complex containing Na, K-ATPase, ankyrin, and fodrin in Madin-Darby canine kidney (MDCK) cells: implications for the biogenesis of epithelial cell polarity. *J. Cell Biol.* **108**, 893-902.
- Nitsch, L. and Wollman, S. H.** (1980). Ultrastructure of intermediate stages in polarity reversal of thyroid epithelium in follicles in suspension culture. *J. Cell Biol.* **86**, 875-880.
- O'Toole, T. E., Loftus, J. C., Plow, E. F., Glass, A. A., Harper, J. R. and Ginsberg, M. H.** (1989). Efficient surface expression of platelet GPIIb-IIIa requires both subunits. *Blood* **74**, 14-18.
- Ojakian, G. K., Schwimmer, R. and Herz, R. E.** (1990). Polarized insertion of an intracellular glycoprotein pool in the apical membrane of MDCK cells. *Amer. J. Physiol.* **258**, C390-C398.

- Parry, G., Beck, J. C., Moss, L., Bartley, J. and Ojakian, G. K. (1990). Determination of apical membrane polarity in mammary epithelial cell cultures: The role of cell-cell, cell-substratum, and membrane-cytoskeleton interactions. *Exp. Cell Res.* **188**, 302-311.
- Pasqualini, R., Bodorova, J., Ye, S. and Hemler, M. E. (1993). A study of the structure, function, and distribution of  $\beta 5$  integrins using novel anti- $\beta 5$  monoclonal antibodies. *J. Cell Sci.* **105**, 101-111.
- Paulsson, M. (1993). Laminin and collagen IV variants and heterogeneity in basement membrane composition. In *Molecular and Cellular Aspects of Basement Membranes* (ed. D. H. Rohrbach and R. Timpl), pp. 177-187. Academic Press, San Diego.
- Pignatelli, M. and Bodmer, W. F. (1990). Integrin cell adhesion molecules and colorectal cancer. *J. Pathol.* **162**, 95-97.
- Pignatelli, M., Smith, M. E. F. and Bodmer, W. F. (1990). Low expression of collagen receptors in moderate and poorly differentiated colorectal carcinomas. *Br. J. Cancer* **61**, 636-638.
- Pignatelli, M., Hanby, A. M. and Stamp, G. W. H. (1991). Low expression of  $\beta 1$ ,  $\alpha 2$ , and  $\alpha 3$  subunits of VLA integrins in malignant mammary tumours. *J. Pathol.* **165**, 25-32.
- Plantefaber, L. C. and Hynes, R. O. (1989). Changes in integrin receptors on oncogenically transformed cells. *Cell* **56**, 281-290.
- Quaranta, V. and Jones, J. C. R. (1991). The internal affairs of an integrin. *Trends Cell Biol.* **1**, 2-4.
- Racusen, L. C. (1992). Alterations in tubular epithelial cell adhesion and mechanisms of acute renal failure. *Lab. Invest.* **67**, 158-165.
- Rodriguez-Boulan, E. and Nelson, W. J. (1989). Morphogenesis of the polarized epithelial cell phenotype. *Science* **245**, 718-725.
- Rodriguez-Boulan, E., Paskiet, K. T. and Sabatini, D. D. (1983). Assembly of enveloped viruses in MDCK cells: polarized budding from single attached cells and from clusters of cells in suspension. *J. Cell Biol.* **96**, 866-874.
- Rodriguez-Boulan, E. and Powell, S. K. (1992). Polarity of epithelial and neuronal cells. *Annu. Rev. Cell Biol.* **8**, 395-427.
- Ruoslahti, E. and Hayman, E. G. (1982). Fibronectin purification: Immunochemical properties and biological activities. *Meth. Enzymol.* **82**, Pt A, 803-831.
- Ruoslahti, E. (1991). Integrins as receptors for extracellular matrix. In *Cell Biology of the Extracellular Matrix, Second* (ed. E. D. Hay), pp. 343-363. Plenum Press, New York.
- Salas, P. J. I., Ponce, M. I., Brignoni, M. and Rodriguez, M. L. (1992). Attachment of Madin-Darby canine kidney cells to extracellular matrix - Role of a laminin binding protein related to the 37/67-kDa laminin receptor in the development of plasma membrane polarization. *Biol. Cell* **75**, 197-210.
- Schoenenberger, C.-A., Zuk, A., Kendall, D. and Matlin, K. S. (1991). Multilayering and loss of apical polarity in MDCK cells transformed with viral K-ras. *J. Cell Biol.* **112**, 873-889.
- Sonnenberg, A., Janssen, H., Hogervorst, F., Calafat, J. and Hilgers, J. (1987). A complex of platelet glycoproteins Ic and IIa identified by a rat monoclonal antibody. *Trends Biochem. Sci.* **262**, 10376-10383.
- Sonnenberg, A., Modderman, P. W. and Hogervorst, F. (1988). Laminin receptor on platelets is the integrin VLA6. *Nature* **336**, 487-489.
- Sonnenberg, A., Linders, C. J. T., Daams, J. H. and Kennel, S. J. (1990a). The  $\alpha 6\beta 1$  (VLA-6) and  $\alpha 6\beta 4$  protein complexes: tissue distribution and biochemical properties. *J. Cell Sci.* **96**, 207-217.
- Sonnenberg, A., Linders, C. J. T., Modderman, P. W., Damsky, C. H., Aumailley, M. and Timpl, R. (1990b). Integrin recognition of different cell-binding fragments of laminin (P1, E3, E8) and evidence that  $\alpha 6\beta 1$  but not  $\alpha 6\beta 4$  functions as a major receptor for fragment E8. *J. Cell Biol.* **110**, 2145-2155.
- Sonnenberg, A., et al. (1991). Integrin  $\alpha 6\beta 4$  complex is located in hemidesmosomes, suggesting a major role in epidermal cell-basement membrane adhesion. *J. Cell Biol.* **113**, 907919.
- Sorokin, L., Sonnenberg, A., Aumailley, M., Timpl, R. and Ekblom, P. (1990). Recognition of the laminin E8 cell-binding site by an integrin possessing the  $\alpha 6$  subunit is essential for epithelial polarization in developing kidney tubules. *J. Cell Biol.* **111**, 1265-1274.
- Springer, T. A. (1990). Adhesion receptors of the immune system. *Nature* **346**, 425-434.
- Staatz, W., Rajpara, S. M., Wayner, E. A., Carter, W. G. and Santoro, S. A. (1989). The membrane glycoprotein Ia-IIa (VLA-2) complex mediates the  $Mg^{++}$ -dependent adhesion of platelets to collagen. *J. Cell Biol.* **108**, 1917-1924.
- Stepp, M. A., Spurr-Michaud, S., Tisdale, A., Elwell, J. and Gipson, I. K. (1990).  $\alpha 4\beta 4$  integrin heterodimer is a component of hemidesmosomes. *Proc. Nat. Acad. Sci. USA* **87**, 8970-8974.
- Suzuki, S. (1986). cDNA and amino acid sequences of the cell adhesion protein receptor recognizing vitronectin reveal a transmembrane domain and homologies with other adhesion protein receptors. *Proc. Nat. Acad. Sci. USA* **83**, 8614-8618.
- Symington, B. E., Takada, Y. and Carter, W. G. (1993). Interaction of integrins  $\alpha 5\beta 1$  and  $\alpha 6\beta 1$  - potential role in keratinocyte intercellular adhesion. *J. Cell Biol.* **120**, 523-535.
- Takada, Y., Elices, M. J., Crouse, C. and Hemler, M. E. (1989). The primary structure of the  $\alpha 4$  subunit of VLA-4: homology to other integrins and a possible cell-cell adhesion function. *EMBO J.* **8**, 1361-1368.
- Takada, Y. and Hemler, M. E. (1989). The primary structure of the VLA-2/collagen receptor  $\alpha 2$  subunit (platelet GPIa): Homology to other integrins and the presence of a possible collagen-binding domain. *J. Cell Biol.* **109**, 397-407.
- Tamura, R. N., Rozzo, C., Stan, L., Chambers, J., Reichardt, L. F., Cooper, H. M. and Quaranta, V. (1990). Epithelial integrin  $\alpha 6\beta 4$ : Complete primary structure of  $\alpha 6$  and variant forms of  $\beta 4$ . *J. Cell Biol.* **111**, 1593-1604.
- Vega-Salas, D. E., Salas, P. J. I., Gundersen, D. and Rodriguez-Boulan, E. (1987). Formation of the apical pole of epithelial (Madin-Darby kidney) cells: polarity of an apical protein is independent of tight junctions while segregation of a basolateral marker requires cell-cell interactions. *J. Cell Biol.* **104**, 905-916.
- Wang, A. Z., Ojakian, G. K. and Nelson, W. J. (1990a). Steps in the morphogenesis of a polarized epithelium. I. Uncoupling of roles of cell-cell and cell-substratum contact in establishing plasma membrane polarity in multicellular epithelial (MDCK) cysts. *J. Cell Sci.* **95**, 137-152.
- Wang, A. Z., Ojakian, G. K. and Nelson, W. J. (1990b). Steps in the morphogenesis of a polarized epithelium. II. Disassembly and assembly of plasma membrane domains during reversal of epithelial polarity in multicellular epithelial cysts. *J. Cell Sci.* **95**, 153-156.
- Wayner, E. A. and Carter, W. G. (1987). Identification of multiple cell adhesion receptors for collagen and fibronectin in human fibrosarcoma cells possessing unique  $\alpha$  and common  $\beta$  subunits. *J. Cell Biol.* **105**, 1873-1884.
- Weinel, R. J., Rosendahl, A., Neumann, K., Chaloupka, B., Erb, D., Rothmund, M. and Santoso, S. (1992). Expression and function of VLA- $\alpha 2$ ,  $\alpha 3$ ,  $\alpha 5$ , and  $\alpha 6$  integrin receptors in pancreatic carcinoma. *Int. J. Cancer* **52**, 827-833.

(Received 3 August 1993 - Accepted 1 November 1993)
